# Supplementary material for: Diagnostic accuracy of self-administered urine glucose test strips as a diabetes screening tool in a low-resource setting in Cambodia
Source: PubMed Central journal article supplement — BMJ Open. 2018 Mar 22;8(3):e019924. doi: 10.1136/bmjopen-2017-019924 (PMC5875619; doi:10.1136/bmjopen-2017-019924), 2018-03-22

# BMJ Open

BMJ Open is committed to open peer review. As part of this commitment we make the peer review history of every article we publish publicly available.

When an article is published we post the peer reviewers' comments and the authors' responses online. We also post the versions of the paper that were used during peer review. These are the versions that the peer review comments apply to.

The versions of the paper that follow are the versions that were submitted during the peer review process. They are not the versions of record or the final published versions. They should not be cited or distributed as the published version of this manuscript.

BMJ Open is an open access journal and the full, final, typeset and author-corrected version of record of the manuscript is available on our site with no access controls, subscription charges or pay-per-view fees (<http://bmjopen.bmj.com>).

If you have any questions on BMJ Open's open peer review process please email [info.bmjopen@bmj.com](mailto:info.bmjopen@bmj.com)

# BMJ Open

## Diagnostic accuracy of self-administered urine glucose test strips as a diabetes screening tool in a low-resource setting in Cambodia

|                                    |                                                                                                                                                                                                                                                                                                                                                |
|------------------------------------|------------------------------------------------------------------------------------------------------------------------------------------------------------------------------------------------------------------------------------------------------------------------------------------------------------------------------------------------|
| Journal:                           | <i>BMJ Open</i>                                                                                                                                                                                                                                                                                                                                |
| Manuscript ID                      | bmjopen-2017-019924                                                                                                                                                                                                                                                                                                                            |
| Article Type:                      | Research                                                                                                                                                                                                                                                                                                                                       |
| Date Submitted by the Author:      | 09-Oct-2017                                                                                                                                                                                                                                                                                                                                    |
| Complete List of Authors:          | Storey, Helen; PATH, Diagnostics<br>Kahn, Ansley; PATH, Noncommunicable Diseases;<br>van Pelt, Maurits; MoPoTsyo<br>Bun, Socheath; MoPoTsyo<br>Daily, Frances<br>Neogi, Tina; PATH<br>Thompson, Matthew; University of Washington, Department of Family<br>Medicine<br>McGuire, Helen; PATH, Noncommunicable Diseases<br>Weigl, Bernhard; PATH |
| <b>Primary Subject<br>Heading</b>: | Diabetes and endocrinology                                                                                                                                                                                                                                                                                                                     |
| Secondary Subject Heading:         | Diagnostics, Global health                                                                                                                                                                                                                                                                                                                     |
| Keywords:                          | Low-resource settings, Diabetes, Diagnostics, Urine glucose test strip,<br>Screening                                                                                                                                                                                                                                                           |
|                                    |                                                                                                                                                                                                                                                                                                                                                |

SCHOLARONE™  
Manuscripts

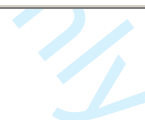

1  
2  
3  
4 1 **Diagnostic accuracy of self-administered urine glucose test strips as**  
5  
6  
7 2 **a diabetes screening tool in a low-resource setting in Cambodia**  
8  
9  
10 3

11 4 Helen L. Storey; PATH, Seattle WA 98109, USA; hstorey@path.org

12  
13 5 Maurits H. van Pelt; MoPoTsyo, Phnom Penh, Cambodia; mopotsyo@gmail.com

14  
15  
16 6 Socheath Bun; MoPoTsyo, Phnom Penh, Cambodia; mopo.medtrainer@gmail.com

17  
18 7 Frances Daily; Phnom Penh, Cambodia; fdaily@bigpond.com

19  
20 8 Tina Neogi<sup>1</sup>; PATH, Seattle WA 98109, USA; tinaneogi@gmail.com

21  
22  
23 9 Matthew Thompson; Department of Family Medicine, University of Washington, Seattle WA  
24  
25 10 98195, USA; mjt@uw.edu

26  
27 11 Helen McGuire; PATH, Washington DC 20001, USA; hmcguire@path.org

28  
29 12 Bernhard H Weigl<sup>2</sup>; PATH, Seattle WA 98109, USA; bweigl@intven.com

30  
31  
32  
33  
34 14 \* Corresponding author: Helen McGuire, PATH, PO Box 900922 Seattle WA 98109,

35  
36 15 [hmcguire@path.org](mailto:hmcguire@path.org), 202-540-4360

37  
38 16 <sup>1</sup> Present Address: UW Neighborhood Ravenna Clinic, Seattle WA 98105

39  
40 17 <sup>2</sup> Present Address: Intellectual Ventures/Global Good, Bellevue WA 98005, USA

41  
42  
43  
44  
45  
46  
47 19  
48 20 **Abstract** (word count: 248)

49  
50 21 **Objective:** Screening for diabetes in low resource countries is a growing challenge, necessitating  
51  
52 22 tests that are resource and context appropriate. The aim of this study was to determine the  
53  
54  
55  
56  
57  
58  
59  
60

1  
2  
3 23 diagnostic accuracy of a self-administered urine glucose test strip compared to alternative  
4  
5 24 diabetes screening tools in a low resource setting of Cambodia.

6  
7  
8 25 **Design:** Prospective cross-sectional study

9  
10 26 **Setting:** Members of the Borey Santhepheap community in Cambodia (Phnom Penh  
11  
12 27 Municipality, District Dangkao, Commune Chom Chao).

13  
14 28 **Participants:** All households on randomly selected streets were invited to participate, and adults  
15  
16 29 at least 18 years of age living in the study area were eligible for inclusion.

17  
18 30 **Outcomes:** The accuracy of self-administered UGTS positivity, HbA1c >6.5%, and cFBG  $\geq$ 126  
19  
20 31 mg/dL were assessed against a composite reference standard of capillary FBG  $\geq$ 200 mg/dL or  
21  
22 32 venous blood glucose 2 hours after OGTT  $\geq$ 200 mg/dL.

23  
24 33 **Results:** Of the 1289 participants, 234 (18%) had diabetes based on either cFBG (74, 32%) or the  
25  
26 34 OGTT (160, 68%). The UGTS was 14% sensitive and 99% specific, and failed to identify 201  
27  
28 35 individuals with diabetes, while falsely identifying 7 without diabetes. Those missed by the  
29  
30 36 UGTS had lower venous FBG, lower 2-hour OGTT, and lower HbA1c compared with those  
31  
32 37 correctly diagnosed.

33  
34 38 **Conclusions:** Low cost, easy to use diabetes tools are essential for low-resource communities  
35  
36 39 with minimal infrastructure. While the UGTS may identify persons with diabetes that might  
37  
38 40 otherwise go undiagnosed in these settings, its poor sensitivity cannot be ignored. The massive  
39  
40 41 burden of diabetes in low-resource settings demands improvements in test technologies.

41  
42 42 **Keywords:** Diabetes, Low-resource settings, Diagnostics, Urine glucose test strip, Screening,  
43  
44 43

45  
46  
47 44 **Article Summary (word count: 2261)**

48  
49  
50 45 **Strengths and limitations of the study**  
51  
52  
53  
54  
55  
56  
57  
58  
59  
60

- 1  
2  
3 46 • This is one of the first studies to determine the prevalence of diabetes and report on the  
4  
5 47 screening accuracy of urine glucose test strips in Cambodia, which are commonly used as  
6  
7  
8 48 screening tests in this setting.  
9  
10 49 • We used a prospective community-based design and had a large sample size with high  
11  
12 50 participation rate, though participation bias towards those able to miss a day of work to  
13  
14 51 attend a clinic visit may still have been an issue.  
15  
16  
17 52 • Use of a composite reference test and not evaluating those with cFBG > 200 mg/dL by the  
18  
19 53 OGTT, could have affected our study results, though the use of OGTT allows comparison  
20  
21 54 of our results to those in a number of other studies.  
22  
23  
24 55 • The urine glucose test was self-administered and self reported, which is pragmatic and  
25  
26 56 aligns with the practices at MoPoTyso and other clinical settings in Cambodia, however  
27  
28 57 errors in interpreting the test result could influence accuracy.  
29  
30  
31  
32 58

## 34 59 **Background**

36 60 According to the International Diabetes Federation (IDF), 415 million adults are living with  
37  
38 61 diabetes globally, almost half of which are undiagnosed, and this number is expected to increase  
39  
40 62 to 642 million by 2040.[1] As is the case for most non-communicable diseases (NCDs), three  
41  
42 63 quarters of those affected live in low- and middle-income countries. In Cambodia for example,  
43  
44 64 there are an estimated 230,000 people with diabetes, who are at risk for the associated micro- and  
45  
46 65 macrovascular complications of this disease, including cardiovascular disease (CVD).[1,2]  
47  
48  
49 66 Strategies to reduce CVD risk may also prevent and control diabetes, which would further reduce  
50  
51 67 rates of eye, kidney, and neural damage due to diabetes complications.[3] To facilitate screening  
52  
53  
54  
55  
56  
57  
58  
59  
60

1  
2  
3 68 and monitoring for diabetes in these low- and middle-income countries, a low-cost, point-of-care  
4  
5 69 diagnostic test that is resource and context appropriate is needed.  
6  
7  
8 70

9  
10 71 In low-resource settings, urine glucose test strips have been used as diabetes screening tools  
11  
12 72 because they are inexpensive, noninvasive, and easy to use.[4,5] While these tests do not require  
13  
14 73 fasting and are user friendly, they can only detect glucose after it has exceeded the threshold for  
15  
16 74 reabsorption by the kidneys and appears in the urine. The reported threshold varies and is  
17  
18 75 affected by kidney function.[6] Although their low sensitivity makes them inadequate for use as  
19  
20 76 a screening tool,[7-9] the World Health Organisation (WHO) acknowledges that they may have a  
21  
22 77 place in low resource settings where other tests are not possible and the prevalence of  
23  
24 78 undiagnosed diabetes may be high.[9] Currently many people are not diagnosed until severe  
25  
26 79 complications develop. Although the sensitivity of the urine test delays diagnosis relative to  
27  
28 80 other methods, it may provide an opportunity to reduce further advancement of complications.  
29  
30  
31  
32

33 81  
34  
35 82 MoPoTsyo, a nongovernmental organization, provides screening and care services to people with  
36  
37 83 diabetes and hypertension in Cambodia through an innovative, community-based peer educator  
38  
39 84 model.[10-12] MoPoTsyo uses urine glucose test strips issued in the community and self-  
40  
41 85 administered by patients as the initial method of diabetes screening, which has allowed them to  
42  
43 86 screen over 700,000 adults, followed by confirmation with blood glucose testing for those who  
44  
45 87 have a positive urine test. The aim of this study was to determine the diagnostic accuracy of a  
46  
47 88 self-administered urine glucose test strip compared to alternative diabetes screening tools in a  
48  
49 89 low resource setting of Cambodia. We also explored whether individuals with diabetes who were  
50  
51 90 detected by urine glucose test strips differed in health status compared to those who were missed  
52  
53  
54  
55  
56  
57  
58  
59  
60

1  
2  
3 91 by this test but detected by blood glucose measurement. Greater understanding of the  
4  
5 92 performance of this test by the MoPoTsyo program will help to inform its optimal use.  
6  
7  
8 93

9  
10 94 **Methods**

11  
12 95 *Study design and procedures*

13  
14 96 A prospective cross-sectional study was performed among members of the Borey Santhepheap  
15  
16 97 community in Cambodia (Phnom Penh Municipality, District Dangkao, Commune Chom Chao)  
17  
18 98 from November 2013 to October 2014. All households on randomly selected streets were invited  
19  
20 99 to participate by a local peer educator, who described the study to all potential household  
21  
22 100 members. Adults at least 18 years of age living in the study area were eligible for inclusion.  
23  
24 101 Individuals were excluded if they had diabetes or hypertension or had taken medications for  
25  
26 102 diabetes and/or high blood pressure in the last 30 days, had kidney disease, or had received  
27  
28 103 dialysis. Informed consent was obtained from all participants. The protocol was approved by the  
29  
30 104 PATH Research Ethics Committee and the National Ethics Committee for Health Research  
31  
32 105 (Cambodia Institutional Review Board). Study methods and results are reported in alignment  
33  
34 106 with the 2015 STARD recommendations.[13]  
35  
36  
37  
38  
39  
40  
41

42 108 After enrollment, all participants were screened for diabetes using a self-administered and self-  
43  
44 109 reported urine glucose test strip (Sichuan Medicines and Health Products, Chengdu, China).  
45  
46 110 Participants were taught how to use the test strip and read the results with assistance of a color  
47  
48 111 chart, and were given several ways to report results to their peer educator. All participants were  
49  
50 112 then invited to attend the clinic following an 8-hour fast for laboratory confirmed tests for  
51  
52 113 diabetes and associated co-morbid risk factors. Upon arriving at the clinic all participants  
53  
54  
55  
56  
57  
58  
59  
60

1  
2  
3 114 provided a urine sample, a venous blood sample, and a finger stick blood sample for capillary  
4  
5 115 fasting blood glucose measurement (cFBG) (On Call Plus glucometer, Acon Laboratories, San  
6  
7 116 Diego, USA). If the cFBG was less than 200 mg/dL they were asked to consume a 75g oral  
8  
9 117 glucose load for the oral glucose tolerance test (OGTT). The oral glucose load was ingested  
10  
11 118 within 5 minutes of starting consumption, and two hours after ingestion, further venous blood  
12  
13 119 and finger stick blood samples were obtained for glucose measurements. During the visit, a  
14  
15 120 health history was completed based on the WHO STEPS surveillance questionnaire [14] and  
16  
17 121 blood pressure measured by trained clinical staff using an electronic device (Omron Corporation,  
18  
19 122 Tokyo, Japan). All devices used in the study were owned and used previously by MoPoTsyo  
20  
21 123 within the guidelines of the Cambodian Ministry of Health; none of the devices were  
22  
23 124 investigational. Additional laboratory tests performed included HbA1c (DCA Vantage Analyzer,  
24  
25 125 Siemens AG, Germany), serum creatinine, glucose, total cholesterol, high-density lipoprotein  
26  
27 126 cholesterol, and triglycerides (Humalyzer 3000 Chemistry Analyzer, Human Diagnostics,  
28  
29 127 Germany), spot urine creatinine, protein, and albumin tests (Combilyzer dipstick reader, Human  
30  
31 128 Diagnostics, Germany).

32  
33 129  
34  
35 130 A sample size of 1315 participants was calculated for a desired precision range of 10% and an  
36  
37 131 estimated sensitivity and specificity of the urine glucose test strip of 21% and 90%, respectively,  
38  
39 132 which is also sufficient for analysis of HbA1c, OGTT, and FBG as the test strip has the lowest  
40  
41 133 performance. The sample size for the study was calculated based on Buderer's formula [15],  
42  
43 134 accounting for a 3% drop-out rate and a 5% national prevalence of diabetes [16].  
44  
45  
46  
47  
48  
49  
50  
51  
52  
53  
54  
55  
56  
57  
58  
59  
60



### 136 ***Data Analysis***

137 The index tests of interest were a positive self-administered urine glucose test strip, HbA1c  
138 >6.5%, and cFBG  $\geq$ 126 mg/dL. Diagnostic accuracy was assessed against a composite reference  
139 standard, which was cFBG  $\geq$ 200 mg/dL, or venous blood glucose, 2 hours after OGTT  $\geq$ 200  
140 mg/dL.[17,18] If the participant's cFBG was >200 mg/dL, the patient was considered to have  
141 diabetes and an OGTT was not performed. Other measures were defined as follows: Overweight  
142 (BMI  $\geq$ 25 or waist circumference >90cm for men or >80cm for women[19]), elevated blood  
143 pressure (systolic pressure  $\geq$ 140mmHg or diastolic pressure  $\geq$ 90mmHg), albuminuria ( $\geq$ 20  
144 mg/L), and elevated albumin/creatinine ratio ( $\geq$ 30mg/g). We calculated sensitivity, specificity,  
145 positive predictive value (PPV), negative predictive value (NPV), positive likelihood ratio  
146 (LR+), negative LR (LR-),with 95% confidence intervals (CI).

147  
148 Subgroup analyses were used to explore the performance of the urine glucose test strip in  
149 participants at increased risk for diabetes mellitus (DM), including age ( $\geq$ 50 years), BMI  
150 ( $\geq$ 25), gender, and waist circumference (>90cm for men or >80cm for women). Prevalence of  
151 diabetes by subgroup was compared by chi-squared test. We also explored whether the  
152 individuals correctly classified by the urine glucose test strip had better or worse controlled  
153 diabetes than those misclassified by the test, as defined by various clinical and laboratory  
154 measures. Continuous values were compared using Student's t-test and dichotomous values were  
155 compared using the chi-squared test. Data were analyzed using Stata/SE 13.1 (StataCorp LP,  
156 Texas, USA).

### 158 **Results**

1  
2  
3 159 Of 1328 eligible study subjects, 1316 participated in the study and 1289 were included in the  
4  
5 160 analysis (Figure 1). Participants were excluded from the analysis if they did not complete the  
6  
7 161 OGTT due to vomiting or other reasons (16), were not fasting prior to the clinic visit (5), or  
8  
9 162 reported taking medication for diabetes that day (6). Of the analyzed participants, 75%  
10  
11 163 (972/1289) were female, mean age was 51 years, 31% had high BMI, and 13% had elevated  
12  
13 164 blood pressure, although only 8% were taking antihypertensive medications. Characteristics of  
14  
15 165 the participants included in the analysis are presented in Table 1.  
16  
17  
18  
19 166

20  
21 167 A total of 234 individuals had diabetes based on the composite reference standard of either  
22  
23 168 cFBG(74, 32%) or the OGTT (160, 68%), corresponding to a prevalence of 18%. Of the index  
24  
25 169 tests evaluated, the urine glucose test strip had lower sensitivity (14.1% sensitive), than cFBG  
26  
27 170 (73.9%), and HbA1c (75.2% sensitive). All three tests offered high specificity (99.3%, 96.8%  
28  
29 171 and 98.5% respectively) (Table 2). The urine glucose test strip failed to identify 201 individuals  
30  
31 172 with diabetes (false negatives) and falsely identified seven participants without diabetes (false  
32  
33 173 positives). The 201 patients with diabetes who were not identified by the urine test had  
34  
35 174 significantly lower venous FBG, lower 2 hr OGTT, and lower HbA1c compared to those  
36  
37 175 correctly diagnosed, but were similar in other characteristics (Table 3). The seven false positive  
38  
39 176 individuals had higher HbA1c, higher systolic BP, and higher proportion receiving treatment for  
40  
41 177 hypertension than those with true negative results (Table 3).  
42  
43  
44  
45  
46  
47  
48

49 179 The prevalence of diabetes (diagnosed by the composite reference standard) was significantly  
50  
51 180 higher in participants who were 50 years of age or older compared to those under 50 years (24%  
52  
53 181 vs. 9.6%,  $p < 0.001$ ); those with high BMI compared to those with normal BMI (22% vs. 17%,  
54  
55  
56  
57  
58  
59  
60

1  
2  
3 182 p=0.03); and those with greater waist circumference compared to those with normal waist (24%  
4  
5 183 vs. 13%, p<0.001), but was the same in males and females (Table 4). The diagnostic accuracy of  
6  
7 184 the urine glucose test strip was similar among subgroups of patients with various cofactors, with  
8  
9 185 overlapping confidence intervals (Table 4).  
10  
11  
12 186

## 14 187 **Discussion**

16 188 Urine glucose test strips had much lower sensitivity than either cFBG or HbA1c, but all three  
17  
18 189 tests offered high specificity. Patients who tested positive with the urine glucose test who were  
19  
20 190 confirmed to have diabetes by the reference standard (true positives) had higher FBG, higher  
21  
22 191 OGTT and higher HbA1c levels compared to the false negative group (urine test negative in  
23  
24 192 patients with diabetes), suggesting that the urine glucose test may identify individuals with poor  
25  
26 193 glycemic control. This suggests a subset of diabetes patients is being identified that is potentially  
27  
28 194 at higher risk of advancing complications or comorbidities, and who may benefit the most from  
29  
30 195 further care [20]. In addition, testing for urine glucose was highly specific (99%), with positive  
31  
32 196 LRs in the 20s, indicating that when positive, this test is highly indicative of diabetes.  
33  
34  
35  
36  
37  
38  
39

40 198 The prevalence of diabetes in the MoPoTsyo population in Cambodia was 18%. This is much  
41  
42 199 higher than the national prevalence for Cambodia, which is reported at 3.0%.[1] This may be due  
43  
44 200 to the high proportion of individuals over 50 years of age in our study population, which could  
45  
46 201 be explained by a participation bias towards those who were able to miss a day of work to attend  
47  
48 202 a clinic visit. Additionally, our study took place in a rapidly changing urban population, which  
49  
50 203 had a 2.4 times higher diabetes prevalence in the STEP survey, country report from 2010.[21]  
51  
52  
53

54 204  
55  
56  
57  
58  
59  
60

1  
2  
3 205 A wide range of sensitivities for the urine glucose test strip has been reported, and its use  
4  
5 206 remains controversial. A review in 2000 found six adequately designed studies that reported  
6  
7 207 performance of urine test strips for glucose.[8] Among these, sensitivities in two reports of  
8  
9 208 fasting patients were 16% and 35%; two using random samples found sensitivities of 18% and  
10  
11 209 64%; and three using postprandial and post-load measurements reported sensitivities between  
12  
13 210 39% and 48%. This review concluded that blood glucose measurements were preferred over  
14  
15 211 urinary glucose or HbA1c, and particularly, postprandial over fasting measures. Another review  
16  
17 212 found five studies reporting a range of sensitivity from 18% to 74% for urine glucose test  
18  
19 213 strips.[7] The review concluded that urine glucose test strips are not sufficient for screening for  
20  
21 214 diabetes.  
22  
23  
24  
25

26 215  
27  
28 216 This is one of the first studies to determine the prevalence of diabetes in Cambodia, and report on  
29  
30 217 the screening accuracy of urine glucose test strips which are commonly used as screening tests in  
31  
32 218 this setting. We used a prospective community-based design and had a large sample size with  
33  
34 219 high participation rate. The study had several limitations. Firstly, we used a composite reference  
35  
36 220 test and those with cFBG > 200 mg/dL were not evaluated by the OGTT. While OGTT is  
37  
38 221 considered the gold standard reference test for assessing diagnostic accuracy, there has been  
39  
40 222 some question of its performance. Two studies in China, each on more than 200 participants,  
41  
42 223 found that the reproducibility of the OGTT was 56% [22] and 66% [23]. Though our choice of  
43  
44 224 the reference standards, particularly OGTT, could have affected our study results, its use allows  
45  
46 225 comparison of our results to those in a number of other studies. Second, the urine glucose test  
47  
48 226 was self-administered and self reported. While this was pragmatic, and aligns with the practices  
49  
50 227 at MoPoTyso and other clinical settings in Cambodia, errors in interpreting the test result could  
51  
52  
53  
54  
55  
56  
57  
58  
59  
60

1  
2  
3 228 influence accuracy. We were not able to repeat this test when patients attended their clinic visit  
4  
5 229 as they were fasting at the clinic visit, and thus their urine would not have been the random non-  
6  
7  
8 230 fasting urine test obtained at home. Third, we were not able to obtain hemoglobin levels (or test  
9  
10 231 for hemoglobin variants) as these tests are not available in this setting, and hence cannot assess  
11  
12 232 the impact of anemia or hemoglobinopathy on test performance. Fourth, glucose test strip  
13  
14 233 accuracy may be subject to effects of heat and humidity, we were not able to explore their  
15  
16  
17 234 possible impact on our results.  
18

19 235  
20  
21 236 For clinicians working in settings similar to ours, the question is how useful is the urine glucose  
22  
23 237 test as a screening or diagnostic test, and is it “better than nothing”? The low sensitivity certainly  
24  
25 238 reduces the value of this test as a screening tool, but the high specificity means that positive tests  
26  
27  
28 239 can be used to rule in patients with diabetes, suggesting that urine glucose may have some  
29  
30 240 diagnostic value in this setting. The false positive rate was extremely low, and only 7 patients  
31  
32 241 without disease were identified as positive by urine glucose test strip. From a population  
33  
34 242 perspective, the value of a low cost, poorly sensitive yet highly specific test for diabetes is  
35  
36  
37 243 unclear in terms of balancing the opportunity to identify a subset of patients with less well  
38  
39 244 controlled diabetes who would not have been identified otherwise, with the downside of a high  
40  
41  
42 245 false negative rate.[24]  
43

44 246  
45  
46  
47 247 Not surprisingly, usability parameters and cost make urine glucose test strips a highly desirable  
48  
49 248 test in this and other low-resource settings.[9] Product attributes such as low complexity and  
50  
51 249 infrastructure requirements, short time to results, and low participant burden greatly contribute to  
52  
53  
54 250 the acceptability and desirability of the screening tool. The large patient burden and the frequent  
55  
56  
57  
58  
59

1  
2  
3 251 inability to comply with fasting requirements reduce the feasibility of using OGTT or FBG tests.  
4

5 252 While HbA1c testing does not require fasting, current tests are too expensive for use in most  
6  
7 253 low-income countries. The role of a poorly sensitive test like urine glucose in resource poor  
8  
9 254 settings such as Cambodia is debatable, on the one hand the test will identify some patients  
10  
11 255 previously undiagnosed, and assuming treatment can be initiated, reduce severity of  
12  
13 256 complications from this disease. On the other hand, the test will miss the majority of patients  
14  
15 257 with diabetes, thus risking a false reassurance, further postponement of diagnosis, and risking  
16  
17 258 patient's respect for the health care system.  
18  
19  
20  
21

22 259  
23  
24 260 There may be strategies to improve the performance (particularly sensitivity) of the urine glucose  
25  
26 261 test strip. First, using presence of risk factors such as high waist circumference or BMI, may  
27  
28 262 increase the pretest probability of diabetes and lead to improved performance. Second, using  
29  
30 263 random, postprandial, or glucose-loaded measurements may be superior than fasting because the  
31  
32 264 renal threshold for glucose is more often reached in non-fasting states.[8] Third, improving the  
33  
34 265 limit of detection may be possible by modifications in the test strip itself, or improvement in the  
35  
36 266 way it is read either manually (with trained users) or automatically (with electronic reading  
37  
38 267 devices). Finally, increasing screening frequency may be feasible in low resource settings, if the  
39  
40 268 urine glucose test strip truly does identify a smaller but more advanced fraction of diabetes  
41  
42 269 patients.  
43  
44  
45  
46

47 270

## 48 49 271 **Conclusion**

50  
51 272 Low cost, easy to use diabetes screening, diagnosis, and monitoring tools are essential for low-  
52  
53 273 resource communities with minimal infrastructure. While the urine glucose test strip has some  
54  
55  
56  
57  
58  
59  
60

1  
2  
3 274 value as a screening test in these settings, its performance is far from optimal. Progress is  
4  
5 275 urgently needed to improve the performance, availability, and access of essential testing  
6  
7  
8 276 technologies for diabetes.  
9

10 277

11  
12 278

13  
14  
15 279 **List of abbreviations**

16  
17 280 urine glucose test strip (UGTS)

18  
19 281 International Diabetes Federation (IDF)

20  
21 282 non-communicable diseases (NCDs)

22  
23 283 cardiovascular disease (CVD)

24  
25 284 World Health Organisation (WHO)

26  
27 285 capillary fasting blood glucose measurement (cFBG)

28  
29 286 oral glucose tolerance test (OGTT)

30  
31 287 positive predictive value (PPV)

32  
33 288 negative predictive value (NPV)

34  
35 289 positive likelihood ratio (LR+)

36  
37 290 negative likelihood ratio (LR-)

38  
39 291 confidence intervals (CI)

40  
41 292 diabetes mellitus (DM)

42  
43 293

44  
45  
46  
47  
48  
49 294 **Declarations**

50  
51 295 *Ethical approval and consent to participate*  
52  
53  
54  
55  
56  
57  
58  
59  
60

1  
2  
3 296 The protocol was approved by the PATH Research Ethics Committee and the National Ethics  
4  
5 297 Committee for Health Research (Cambodia Institutional Review Board). Informed consent was  
6  
7  
8 298 obtained from all participants.

9  
10 299 ***Consent for publication***

11  
12 300 Not applicable.

13  
14 301 ***Availability of data and material***

15  
16  
17 302 The datasets used during the current study are available from the corresponding author on  
18  
19 303 reasonable request.

20  
21 304 ***Competing Interests***

22  
23  
24 305 The authors declare that they have no competing interests.

25  
26 306 ***Funding***

27  
28 307 This work was supported by a grant from Medtronic Foundation, and received additional support  
29  
30  
31 308 from PATH and the University of Washington Department of Family Medicine. The funding  
32  
33 309 source had no involvement in study design, data collection, data analysis, data interpretation,  
34  
35 310 writing of the manuscript, or the decision to publish the results.

36  
37 311 ***Authors contributions***

38  
39  
40 312 MHP, SB, TN, HM and BW designed the study; MHP, SB, TN, and BW implemented the study;  
41  
42 313 HLS, MT, HM, and BW analysed and interpreted the data; HLS, MHP, FD, MT, HM, and BW  
43  
44 314 contributed to writing. All authors read and approved the final manuscript.

45  
46 315 ***Acknowledgements***

47  
48  
49 316 We would like to acknowledge the Borey Santhepheap community in Cambodia (Phnom Penh  
50  
51 317 Municipality, District Dangkao, Commune Chom Chao) for participating in this study. We also



318 acknowledge the input of Dr Annette Fitzpatrick and Dr Jim LoGerfo from the University of  
 319 Washington.

### 320 *Authors' information*

321 Not applicable.

322

323

## 324 **Tables**

325

326 **Table 1.** Characteristics of included participants.

|                                                   | Mean (SD) or %<br>n=1289 |
|---------------------------------------------------|--------------------------|
| Age, years                                        | 51.4 (14.9)              |
| Female (%)                                        | 75.4                     |
| BMI <sup>1</sup>                                  | 23.2 (4.1)               |
| High BMI (%)                                      | 30.5                     |
| Waist circumference above cutoff <sup>2</sup> (%) | 46.1                     |
| Systolic blood pressure, mmHg                     | 123.5 (20.6)             |
| Diastolic blood pressure, mmHg                    | 80.8 (12.1)              |
| Elevated blood pressure (%)                       | 12.9                     |
| Take treatment for high blood pressure (%)        | 8.2                      |

327 <sup>1</sup> n=1288

328 <sup>2</sup> >90cm for men, >80cm for women. [19]

329

330

331 **Table 2.** Diagnostic accuracy of urine glucose test strip, capillary fasting glucose, and HbA1c determined  
 332 by comparison with the composite reference standard (n=1289)<sup>1</sup>.

333

|                                                     | Urine glucose test<br>strip positive | cFBG ≥126 mg/dL   | HbA1c >6.5%       |
|-----------------------------------------------------|--------------------------------------|-------------------|-------------------|
| <b>True positive (n)</b>                            | 33                                   | 173               | 176               |
| <b>False positive (n)</b>                           | 7                                    | 34                | 16                |
| <b>False negative (n)</b>                           | 201                                  | 61                | 58                |
| <b>True negative (n)</b>                            | 1048                                 | 1021              | 1039              |
| <b>True diabetes prevalence<sup>1</sup> (95%CI)</b> | 18%, 234/1289 (16, 20.4)             |                   |                   |
| <b>Sensitivity (95% CI)</b>                         | 14.1 (9.90, 19.2)                    | 73.9 (67.8, 79.4) | 75.2 (69.2, 80.6) |
| <b>Specificity (95% CI)</b>                         | 99.3 (98.6, 99.7)                    | 96.8 (95.5, 97.8) | 98.5 (97.5, 99.1) |
| <b>Positive PV (95% CI)</b>                         | 82.5 (67.2, 92.7)                    | 83.6 (77.8, 88.3) | 91.7 (86.8, 95.2) |
| <b>Negative PV (95% CI)</b>                         | 83.9 (81.7, 85.9)                    | 94.4 (92.8, 95.7) | 94.7 (93.2, 96.0) |
| <b>Positive LR (95% CI)</b>                         | 21.3 (9.50, 47.5)                    | 22.9 (16.3, 32.2) | 49.6 (30.3, 81.1) |
| <b>Negative LR (95% CI)</b>                         | 0.90 (0.80, 0.90)                    | 0.30 (0.20, 0.30) | 0.30 (0.20, 0.30) |

334 <sup>1</sup> Excludes individuals taking diabetes treatment that day (n=6), did not fast before OGTT as instructed (n=5), or did  
 335 not complete the OGTT (n=16). 74 patients with cFBG ≥200 were not tested by OGTT.

336 <sup>2</sup> Composite reference standard: OGTT ≥200 mg/dL or cFBG ≥200 mg/dL.

337

338

339  
340  
341  
342

**Table 3.** Diagnostic accuracy of the urine glucose test strip by patient characteristics.

| Patient characteristic                     | Diabetic <sup>1</sup>                   |                                        | Non-diabetic <sup>1</sup>               |                                        |
|--------------------------------------------|-----------------------------------------|----------------------------------------|-----------------------------------------|----------------------------------------|
|                                            | True Positive<br>n=33<br>Mean (SD) or % | False Negative n=201<br>Mean (SD) or % | False Positive<br>n=7<br>Mean (SD) or % | True Negative n=1048<br>Mean (SD) or % |
| Age                                        | 57 (9.3)                                | 58 (10.5)                              | 56 (11.9)                               | 50 (15.5)                              |
| Female (%)                                 | 81.8                                    | 74.6                                   | 85.7                                    | 75.3                                   |
| Venous fasting blood glucose               | <b>207 (75.3)</b>                       | <b>166 (73.2)</b>                      | 95 (16.9)                               | 90 (13.1)                              |
| Venous blood glucose 2 hrs after OGTT      | <b>310 (60.8)</b>                       | <b>275 (62.2)</b>                      | 115 (43.2)                              | 120 (31.0)                             |
| Change in venous blood glucose during OGTT | 160 (50.8)                              | 146 (49.8)                             | 20 (47.7)                               | 30 (30.0)                              |
| HbA1c                                      | <b>10 (2.3)</b>                         | <b>8 (2.4)</b>                         | <b>6 (0.7)</b>                          | <b>5 (0.5)</b>                         |
| BMI                                        | 24 (3.9)                                | 24 (3.9)                               | 26 (3.2)                                | 23 (4.1)                               |
| High BMI (%)                               | 33.3                                    | 36.8                                   | 57.1                                    | 29.0                                   |
| Waist circumference above cutoff (%)       | 60.6                                    | 61.7                                   | 71.4                                    | 42.8                                   |
| Systolic blood pressure                    | 132 (24.9)                              | 130 (20.6)                             | <b>146 (14.0)</b>                       | <b>122 (20.2)</b>                      |
| Diastolic blood pressure                   | 85 (9.6)                                | 84 (11.7)                              | 87 (6.5)                                | 80 (12.1)                              |
| Elevated blood pressure (%)                | 15.2                                    | 20.9                                   | 14.3                                    | 11.3                                   |
| Take treatment for high blood pressure (%) | 18.2                                    | 11.4                                   | <b>28.6</b>                             | <b>7.1</b>                             |
| Total Cholesterol                          | 242 (62.3)                              | 227 (69.8)                             | 240 (63.1)                              | 213 (56.3)                             |
| Proteinuria (n=1116) <sup>2</sup> (%)      | 20.0                                    | 17.2                                   | 0                                       | 3.0                                    |
| Albuminuria (%)                            | 51.5                                    | 47.8                                   | 14.3                                    | 21.7                                   |
| Abnormal albumin/creatinine ratio (%)      | 39.3                                    | 39.3                                   | 14.3                                    | 17.3                                   |

343  
344  
345  
346  
347

<sup>1</sup> Diagnosis by the composite reference standard: venous OGTT  $\geq 200$  mg/dL or cFBG  $\geq 200$  mg/dL.

<sup>2</sup> 4 missing values, 169 indeterminate measurements not included in analysis.

**Bold = significantly different ( $p \leq 0.05$ ) by Student's t-test or chi-squared test.**

348

**Table 4.** Diagnostic accuracy of urine glucose test strip by participant cofactors (n=1289)<sup>1</sup>.

349  
350

| Results                               | Cofactors                             |                                       |                                       |                                       |                        |                         |                                       |                                       |
|---------------------------------------|---------------------------------------|---------------------------------------|---------------------------------------|---------------------------------------|------------------------|-------------------------|---------------------------------------|---------------------------------------|
|                                       | Age                                   |                                       | BMI <sup>1</sup>                      |                                       | Gender                 |                         | Waist circumference <sup>3</sup>      |                                       |
|                                       | <50                                   | $\geq 50$                             | <25                                   | $\geq 25$                             | Male                   | Female                  | Normal                                | High                                  |
| Number of participants                | 531                                   | 758                                   | 895                                   | 393                                   | 317                    | 972                     | 691                                   | 598                                   |
| True positive (n)                     | 8                                     | 25                                    | 22                                    | 11                                    | 6                      | 27                      | 13                                    | 20                                    |
| False positive (n)                    | 3                                     | 4                                     | 3                                     | 4                                     | 1                      | 6                       | 2                                     | 5                                     |
| False negative (n)                    | 43                                    | 158                                   | 127                                   | 74                                    | 51                     | 150                     | 77                                    | 124                                   |
| True negative (n)                     | 477                                   | 571                                   | 743                                   | 304                                   | 259                    | 789                     | 599                                   | 449                                   |
| True diabetes prevalence <sup>2</sup> | <b>9.6%</b><br>(7.2,<br><b>12.4</b> ) | <b>24%</b><br>(21.0,<br><b>27.4</b> ) | <b>17%</b><br>(14.0,<br><b>19.3</b> ) | <b>22%</b><br>(18.0,<br><b>26.0</b> ) | 18%<br>(14.0,<br>22.7) | 18%<br>(16.0,<br>20.8)  | <b>13%</b><br>(11.0,<br><b>15.8</b> ) | <b>24%</b><br>(21.0,<br><b>27.7</b> ) |
| Sensitivity (95% CI)                  | 15.7<br>(7.0,<br>28.6)                | 13.7<br>(9.0,<br>19.5)                | 14.8<br>(9.5,<br>21.5)                | 12.9<br>(6.6,<br>22.0)                | 10.5<br>(4.0,<br>21.5) | 15.3<br>(10.3,<br>21.4) | 14.4<br>(7.9,<br>23.4)                | 13.9<br>(8.7,<br>20.6)                |

|                             |                      |                      |                      |                       |                      |                      |                      |                      |
|-----------------------------|----------------------|----------------------|----------------------|-----------------------|----------------------|----------------------|----------------------|----------------------|
| <b>Specificity (95% CI)</b> | 99.4<br>(98.2, 99.9) | 99.3<br>(98.2, 99.8) | 99.6<br>(98.8, 99.9) | 98.7<br>(96.7, 99.6)  | 99.6<br>(97.9, 100)  | 99.2<br>(98.4, 99.7) | 99.7<br>(98.8, 100)  | 98.9<br>(97.4, 99.6) |
| <b>Positive PV (95% CI)</b> | 72.7<br>(39, 94.0)   | 86.2<br>(68.3, 96.1) | 88<br>(68.8, 97.5)   | 73.3<br>(44.96, 92.2) | 85.7<br>(42.1, 99.6) | 81.8<br>(64.5, 93.0) | 86.7<br>(59.5, 98.3) | 80<br>(59.3, 93.2)   |
| <b>Negative PV (95% CI)</b> | 91.7<br>(89, 94)     | 78.3<br>(75.2, 81.3) | 85.4<br>(82.9, 87.7) | 80.4<br>(76.1, 84.3)  | 83.5<br>(78.9, 87.5) | 84<br>(81.5, 86.3)   | 88.6<br>(86, 90.9)   | 78.4<br>(74.8, 81.7) |
| <b>Positive LR (95% CI)</b> | 25.1<br>(6.9, 91.6)  | 19.6<br>(6.9, 55.7)  | 36.7<br>(11.1, 121)  | 10.0<br>(3.3, 30.5)   | 27.4<br>(3.4, 223)   | 20.2<br>(8.5, 48.2)  | 43.4<br>(10.0, 189)  | 12.6<br>(4.8, 33)    |
| <b>Negative LR (95% CI)</b> | 0.8<br>(0.8, 1.0)    | 0.9<br>(0.8, 0.9)    | 0.9<br>(0.8, 0.9)    | 0.9<br>(0.8, 1.0)     | 0.9<br>(0.8, 1.0)    | 0.85<br>(0.80, 0.91) | 0.86<br>(0.79, 0.94) | 0.87<br>(0.82, 0.93) |

<sup>1</sup> Excluded individuals taking diabetes treatment that day (n=6), did not fast before OGTT as instructed (n=5), or did not complete the OGTT (n=16). 74 patients with cFBG $\geq$ 200 were not tested by OGTT; 1 patient had cFBG $\geq$ 200 and also tested OGTT positive.

<sup>2</sup> True prevalence as determined by the composite reference standard. Total number of diabetes diagnoses: 234 (18% prevalence).

<sup>3</sup> High Waist circumference = >90cm for men, >80cm for women.[19]

**Bold = significantly different ( $p \leq 0.05$ ), chi-squared test.**

## Figures

**Figure 1:** Study flow diagram.

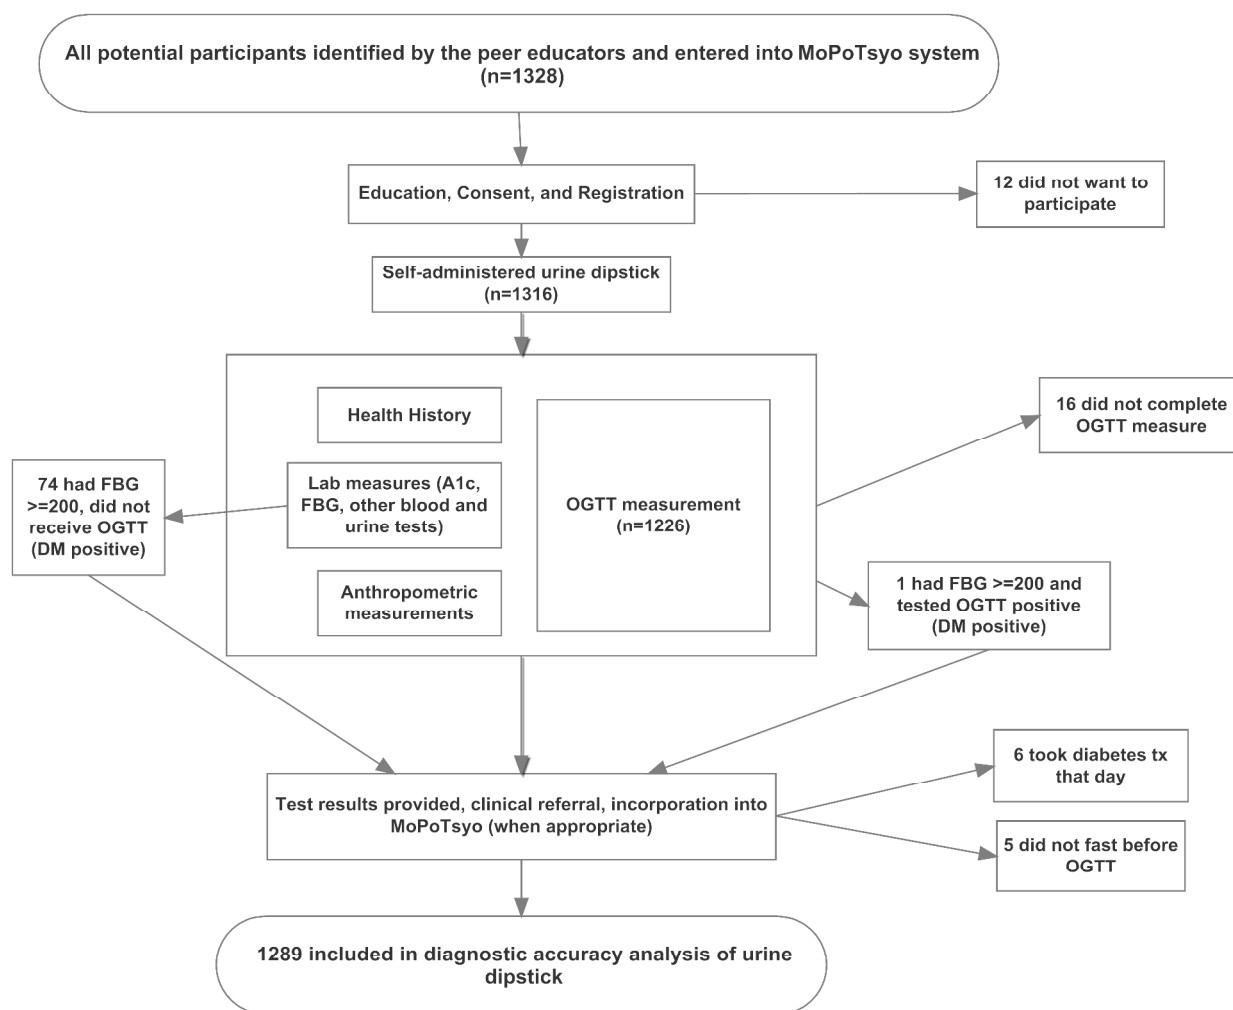

## Reference List

1. IDF Diabetes Atlas, 7th Edition. International Diabetes Federation . 2015. International Diabetes Federation.  
Ref Type: Electronic Citation
2. Forbes JM, Cooper ME: **Mechanisms of diabetic complications.** *Physiol Rev* 2013, **93(1)**: 137-188.
3. Tuomilehto J, Lindstrom J, Eriksson JG, Valle TT, Hamalainen H, Ilanne-Parikka P *et al.*: **Prevention of type 2 diabetes mellitus by changes in lifestyle among subjects with impaired glucose tolerance.** *N Engl J Med* 2001, **344**: 1343-1350.
4. Dyerberg J, Pedersen L, Aagaard O: **Evaluation of a dipstick test for glucose in urine.** *Clin Chem* 1976, **22**: 205-210.

- 1  
2  
3 381 5. van der Sande MA, Walraven GE, Bailey R, Rowley JT, Banya WA, Nyan OA *et al.*: **Is there a**  
4 382 **role for glycosuria testing in sub-Saharan Africa?** *Trop Med Int Health* 1999, **4**: 506-513.  
5  
6 383 6. Taal MW, Chertow GM, Marsden PA, Skorecki K, Yu ASL, Brenner BM: **Laboratory**  
7 384 **Assessment of Kidney Disease: Glomerular Filtration Rate, Urinalysis, and Proteinuria.** In  
8 385 *Brenner & Rector's The Kidney*. Philadelphia: Elsevier; 2012.  
9  
10 386 7. Wei OY, Teece S: **Best evidence topic report. Urine dipsticks in screening for diabetes**  
11 387 **mellitus.** *Emerg Med J* 2006, **23**: 138.  
12  
13 388 8. Engelgau MM, Narayan KM, Herman WH: **Screening for type 2 diabetes.** *Diabetes Care* 2000,  
14 389 **23**: 1563-1580.  
15  
16 390 9. World Health Organization. Screening for Type 2 Diabetes. Report of a World Health Organization  
17 391 and International Diabetes Federation meeting. 2003. Geneva, Switzerland, World Health  
18 392 Organization.  
19 393 Ref Type: Report  
20  
21 394 10. van Pelt M: **Improving access to education and care in Cambodia.** *Diabetes Voice* 2009, **54**.  
22  
23 395 11. Taniguchi D, LoGerfo J, van PM, Mielcarek B, Huster K, Haider M *et al.*: **Evaluation of a multi-**  
24 396 **faceted diabetes care program including community-based peer educators in Takeo province,**  
25 397 **Cambodia, 2007-2013.** *PLoS One* 2017, **12**: e0181582.  
26  
27 398 12. van Olmen J, Eggermont N, van Pelt M, Hen H, de Man J, Schellevis F *et al.*: **Patient-centred**  
28 399 **innovation to ensure access to diabetes care in Cambodia: the case of MoPoTsyo.** *J Pharm*  
30 400 *Policy Pract* 2016, **9**: 1.  
31  
32 401 13. Bossuyt PM, Reitsma JB, Bruns DE, Gatsonis CA, Glasziou PP, Irwig L *et al.*: **STARD 2015: an**  
33 402 **updated list of essential items for reporting diagnostic accuracy studies.** *BMJ* 2015, **351**:  
34 403 h5527.  
35  
36 404 14. World Health Organization. WHO STEPS Surveillance Manual. World Health Organization . 6-13-  
37 405 2008. World Health Organization. 4-30-2015.  
38 406 Ref Type: Electronic Citation  
39  
40 407 15. Obuchowski NA: **Sample size calculations in studies of test accuracy.** *Stat Methods Med Res*  
41 408 1998, **7**: 371-392.  
42  
43 409 16. King H, Keuky L, Seng S, Khun T, Roglic G, Pinget M: **Diabetes and associated disorders in**  
44 410 **Cambodia: two epidemiological surveys.** *Lancet* 2005, **366**: 1633-1639.  
45  
46 411 17. **Standards of Medical Care in Diabetes-2016 Abridged for Primary Care Providers.** *Clin*  
47 412 *Diabetes* 2016, **34**: 3-21.  
48  
49 413 18. Bartoli E, Fra GP, Carnevale Schianca GP: **The oral glucose tolerance test (OGTT) revisited.**  
50 414 *Eur J Intern Med* 2011, **22**: 8-12.  
51  
52 415 19. World Health Organization. Waist circumference and waist-hip ratio: report of a WHO expert  
53 416 consultation, Geneva, 8-11 December 2008. 2011. Geneva, Switzerland, World Health  
54 417 Organization.  
55  
56  
57  
58  
59  
60

1  
2  
3 418 Ref Type: Report  
4

5 419 20. **The effect of intensive treatment of diabetes on the development and progression of long-term**  
6 **420 complications in insulin-dependent diabetes mellitus. The Diabetes Control and**  
7 **421 Complications Trial Research Group. *N Engl J Med* 1993, **329**: 977-986.**

9 422 21. University of Health Sciences Cambodia, Ministry of Health Cambodia. Prevalence of non-  
10 **423** communicable disease risk factors in Cambodia; STEPS Survey Country Report. 2010.

11  
12 424 Ref Type: Report

13 425 22. Liu M, Pan CY, Jin MM, Su HY, Lu JM: **[The reproducibility and clinical significance of oral**  
14 **426 glucose tolerance test for abnormal glucose metabolism]. *Zhonghua Nei Ke Za Zhi* 2007, **46**:**  
15 **427 1007-1010.**

17 428 23. Ko GT, Chan JC, Woo J, Lau E, Yeung VT, Chow CC *et al.*: **The reproducibility and usefulness**  
18 **429 of the oral glucose tolerance test in screening for diabetes and other cardiovascular risk**  
20 **430 factors. *Ann Clin Biochem* 1998, **35 ( Pt 1)**: 62-67.**

21  
22 431 24. Flessa S, Zembok A: **Costing of diabetes mellitus type II in Cambodia. *Health Econ Rev* 2014,**  
23 **432 4**: 24.

24 433  
25 434  
26 435  
27 436

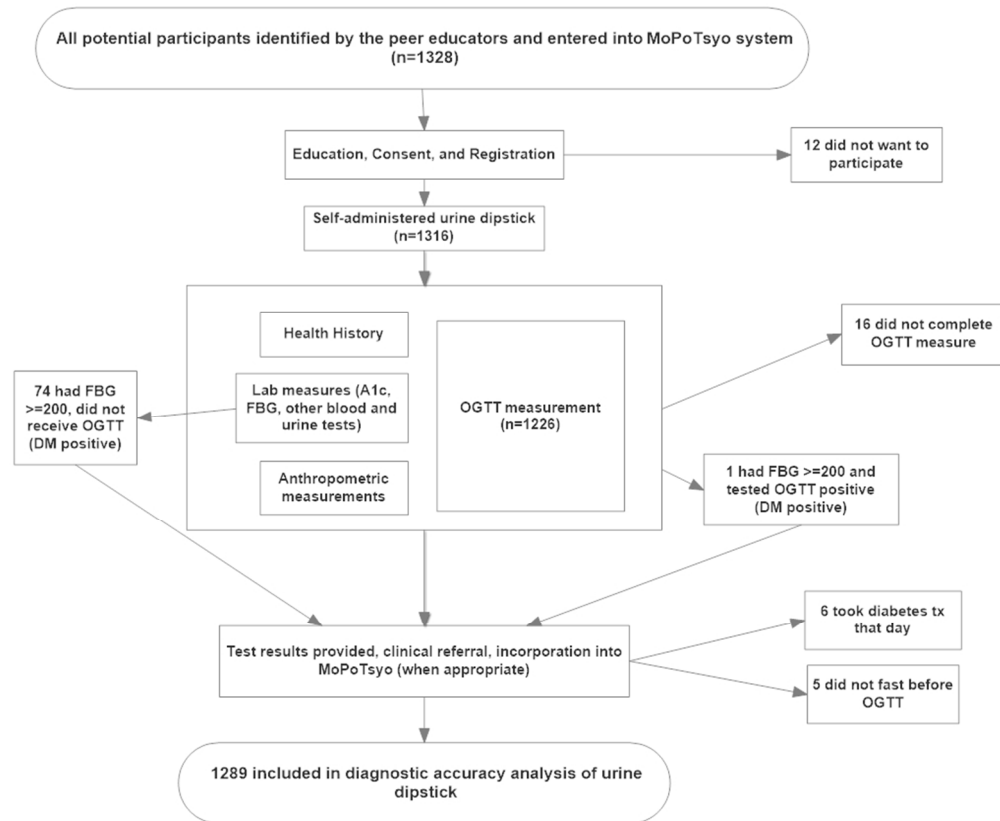

86x71mm (300 x 300 DPI)

| Section & Topic          | No  | Item                                                                                                                                                   | Reported on page # |
|--------------------------|-----|--------------------------------------------------------------------------------------------------------------------------------------------------------|--------------------|
| <b>TITLE OR ABSTRACT</b> |     |                                                                                                                                                        |                    |
|                          | 1   | Identification as a study of diagnostic accuracy using at least one measure of accuracy (such as sensitivity, specificity, predictive values, or AUC)  | 1                  |
| <b>ABSTRACT</b>          |     |                                                                                                                                                        |                    |
|                          | 2   | Structured summary of study design, methods, results, and conclusions (for specific guidance, see STARD for Abstracts)                                 | 1                  |
| <b>INTRODUCTION</b>      |     |                                                                                                                                                        |                    |
|                          | 3   | Scientific and clinical background, including the intended use and clinical role of the index test                                                     | 3                  |
|                          | 4   | Study objectives and hypotheses                                                                                                                        | 4                  |
| <b>METHODS</b>           |     |                                                                                                                                                        |                    |
| <i>Study design</i>      | 5   | Whether data collection was planned before the index test and reference standard were performed (prospective study) or after (retrospective study)     | 5                  |
| <i>Participants</i>      | 6   | Eligibility criteria                                                                                                                                   | 5                  |
|                          | 7   | On what basis potentially eligible participants were identified (such as symptoms, results from previous tests, inclusion in registry)                 | 5                  |
|                          | 8   | Where and when potentially eligible participants were identified (setting, location and dates)                                                         | 5                  |
|                          | 9   | Whether participants formed a consecutive, random or convenience series                                                                                | 5                  |
| <i>Test methods</i>      | 10a | Index test, in sufficient detail to allow replication                                                                                                  | 5                  |
|                          | 10b | Reference standard, in sufficient detail to allow replication                                                                                          | 6                  |
|                          | 11  | Rationale for choosing the reference standard (if alternatives exist)                                                                                  | 6                  |
|                          | 12a | Definition of and rationale for test positivity cut-offs or result categories of the index test, distinguishing pre-specified from exploratory         | 6                  |
|                          | 12b | Definition of and rationale for test positivity cut-offs or result categories of the reference standard, distinguishing pre-specified from exploratory | 6                  |
|                          | 13a | Whether clinical information and reference standard results were available to the performers/readers of the index test                                 | 6                  |
|                          | 13b | Whether clinical information and index test results were available to the assessors of the reference standard                                          | 6                  |
| <i>Analysis</i>          | 14  | Methods for estimating or comparing measures of diagnostic accuracy                                                                                    | 7                  |
|                          | 15  | How indeterminate index test or reference standard results were handled                                                                                | 7                  |
|                          | 16  | How missing data on the index test and reference standard were handled                                                                                 | 7                  |
|                          | 17  | Any analyses of variability in diagnostic accuracy, distinguishing pre-specified from exploratory                                                      | 7                  |
|                          | 18  | Intended sample size and how it was determined                                                                                                         | 6                  |
| <b>RESULTS</b>           |     |                                                                                                                                                        |                    |
| <i>Participants</i>      | 19  | Flow of participants, using a diagram                                                                                                                  | 17                 |
|                          | 20  | Baseline demographic and clinical characteristics of participants                                                                                      | 15                 |
|                          | 21a | Distribution of severity of disease in those with the target condition                                                                                 | 15                 |
|                          | 21b | Distribution of alternative diagnoses in those without the target condition                                                                            | NA                 |
|                          | 22  | Time interval and any clinical interventions between index test and reference standard                                                                 | 5                  |
| <i>Test results</i>      | 23  | Cross tabulation of the index test results (or their distribution) by the results of the reference standard                                            | 15                 |
|                          | 24  | Estimates of diagnostic accuracy and their precision (such as 95% confidence intervals)                                                                | 15                 |
|                          | 25  | Any adverse events from performing the index test or the reference standard                                                                            | NA                 |
| <b>DISCUSSION</b>        |     |                                                                                                                                                        |                    |
|                          | 26  | Study limitations, including sources of potential bias, statistical uncertainty, and generalisability                                                  | 10                 |
|                          | 27  | Implications for practice, including the intended use and clinical role of the index test                                                              | 11                 |
| <b>OTHER INFORMATION</b> |     |                                                                                                                                                        |                    |
|                          | 28  | Registration number and name of registry                                                                                                               | NA                 |
|                          | 29  | Where the full study protocol can be accessed                                                                                                          | NA                 |
|                          | 30  | Sources of funding and other support; role of funders                                                                                                  | 14                 |



# STARD 2015

---

## AIM

STARD stands for “Standards for Reporting Diagnostic accuracy studies”. This list of items was developed to contribute to the completeness and transparency of reporting of diagnostic accuracy studies. Authors can use the list to write informative study reports. Editors and peer-reviewers can use it to evaluate whether the information has been included in manuscripts submitted for publication.

---

## EXPLANATION

A **diagnostic accuracy study** evaluates the ability of one or more medical tests to correctly classify study participants as having a **target condition**. This can be a disease, a disease stage, response or benefit from therapy, or an event or condition in the future. A medical test can be an imaging procedure, a laboratory test, elements from history and physical examination, a combination of these, or any other method for collecting information about the current health status of a patient.

The test whose accuracy is evaluated is called **index test**. A study can evaluate the accuracy of one or more index tests. Evaluating the ability of a medical test to correctly classify patients is typically done by comparing the distribution of the index test results with those of the **reference standard**. The reference standard is the best available method for establishing the presence or absence of the target condition. An accuracy study can rely on one or more reference standards.

If test results are categorized as either positive or negative, the cross tabulation of the index test results against those of the reference standard can be used to estimate the **sensitivity** of the index test (the proportion of participants *with* the target condition who have a positive index test), and its **specificity** (the proportion *without* the target condition who have a negative index test). From this cross tabulation (sometimes referred to as the contingency or “2x2” table), several other accuracy statistics can be estimated, such as the positive and negative **predictive values** of the test. Confidence intervals around estimates of accuracy can then be calculated to quantify the statistical **precision** of the measurements.

If the index test results can take more than two values, categorization of test results as positive or negative requires a **test positivity cut-off**. When multiple such cut-offs can be defined, authors can report a receiver operating characteristic (ROC) curve which graphically represents the combination of sensitivity and specificity for each possible test positivity cut-off. The **area under the ROC curve** informs in a single numerical value about the overall diagnostic accuracy of the index test.

The **intended use** of a medical test can be diagnosis, screening, staging, monitoring, surveillance, prediction or prognosis. The **clinical role** of a test explains its position relative to existing tests in the clinical pathway. A replacement test, for example, replaces an existing test. A triage test is used before an existing test; an add-on test is used after an existing test.

Besides diagnostic accuracy, several other outcomes and statistics may be relevant in the evaluation of medical tests. Medical tests can also be used to classify patients for purposes other than diagnosis, such as staging or prognosis. The STARD list was not explicitly developed for these other outcomes, statistics, and study types, although most STARD items would still apply.

---

## DEVELOPMENT

This STARD list was released in 2015. The 30 items were identified by an international expert group of methodologists, researchers, and editors. The guiding principle in the development of STARD was to select items that, when reported, would help readers to judge the potential for bias in the study, to appraise the applicability of the study findings and the validity of conclusions and recommendations. The list represents an update of the first version, which was published in 2003.

More information can be found on <http://www.equator-network.org/reporting-guidelines/stard>.

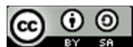

# BMJ Open

## Diagnostic accuracy of self-administered urine glucose test strips as a diabetes screening tool in a low-resource setting in Cambodia

|                                    |                                                                                                                                                                                                                                                                                                                                                |
|------------------------------------|------------------------------------------------------------------------------------------------------------------------------------------------------------------------------------------------------------------------------------------------------------------------------------------------------------------------------------------------|
| Journal:                           | <i>BMJ Open</i>                                                                                                                                                                                                                                                                                                                                |
| Manuscript ID                      | bmjopen-2017-019924.R1                                                                                                                                                                                                                                                                                                                         |
| Article Type:                      | Research                                                                                                                                                                                                                                                                                                                                       |
| Date Submitted by the Author:      | 09-Jan-2018                                                                                                                                                                                                                                                                                                                                    |
| Complete List of Authors:          | Storey, Helen; PATH, Diagnostics<br>Kahn, Ansley; PATH, Noncommunicable Diseases;<br>van Pelt, Maurits; MoPoTsyo<br>Bun, Socheath; MoPoTsyo<br>Daily, Frances<br>Neogi, Tina; PATH<br>Thompson, Matthew; University of Washington, Department of Family<br>Medicine<br>McGuire, Helen; PATH, Noncommunicable Diseases<br>Weigl, Bernhard; PATH |
| <b>Primary Subject<br>Heading</b>: | Diabetes and endocrinology                                                                                                                                                                                                                                                                                                                     |
| Secondary Subject Heading:         | Diagnostics, Global health                                                                                                                                                                                                                                                                                                                     |
| Keywords:                          | Low-resource settings, Diabetes, Diagnostics, Urine glucose test strip,<br>Screening                                                                                                                                                                                                                                                           |
|                                    |                                                                                                                                                                                                                                                                                                                                                |

SCHOLARONE™  
Manuscripts

1  
2  
3  
4 1 **Diagnostic accuracy of self-administered urine glucose test strips as**  
5  
6  
7 2 **a diabetes screening tool in a low-resource setting in Cambodia**  
8  
9 3

10  
11 4 Helen L. Storey; PATH, Seattle WA 98109, USA; hstorey@path.org  
12

13 5 Maurits H. van Pelt; MoPoTsyo, Phnom Penh, Cambodia; mopotsyo@gmail.com  
14

15 6 Socheath Bun; MoPoTsyo, Phnom Penh, Cambodia; mopo.medtrainer@gmail.com  
16

17 7 Frances Daily; Phnom Penh, Cambodia; fdaily@bigpond.com  
18

19 8 Tina Neogi<sup>1</sup>; PATH, Seattle WA 98109, USA; tinaneogi@gmail.com  
20

21 9 Matthew Thompson; Department of Family Medicine, University of Washington, Seattle WA  
22  
23 98195, USA; mjt@uw.edu  
24

25 10  
26 11 Helen McGuire; PATH, Washington DC 20001, USA; hmcguire@path.org  
27

28 12 Bernhard H Weigl<sup>2</sup>; PATH, Seattle WA 98109, USA; bweigl@intven.com  
29

30 13  
31  
32  
33  
34 14 \* Corresponding author: Helen McGuire, PATH, PO Box 900922 Seattle WA 98109,  
35  
36 15 [hmcguire@path.org](mailto:hmcguire@path.org), 202-540-4360  
37

38 16 <sup>1</sup> Present Address: UW Neighborhood Ravenna Clinic, Seattle WA 98105  
39

40 17 <sup>2</sup> Present Address: Intellectual Ventures/Global Good, Bellevue WA 98005, USA  
41

42 18  
43  
44  
45  
46 19  
47 20 **Abstract** (word count: 287)  
48

49 21 **Objective:** Screening for diabetes in low resource countries is a growing challenge, necessitating  
50  
51 tests that are resource and context appropriate. The aim of this study was to determine the  
52  
53  
54  
55  
56  
57  
58  
59  
60

23 diagnostic accuracy of a self-administered urine glucose test strip compared to alternative  
24 diabetes screening tools in a low resource setting of Cambodia.

25 **Design:** Prospective cross-sectional study

26 **Setting:** Members of the Borey Santhepheap community in Cambodia (Phnom Penh  
27 Municipality, District Dangkao, Commune Chom Chao).

28 **Participants:** All households on randomly selected streets were invited to participate, and adults  
29 at least 18 years of age living in the study area were eligible for inclusion.

30 **Outcomes:** The accuracy of self-administered urine glucose test strip positivity, HbA1c >6.5%,  
31 and capillary fasting blood glucose measurement  $\geq 126$  mg/dL were assessed against a composite  
32 reference standard of capillary fasting blood glucose measurement  $\geq 200$  mg/dL or venous blood  
33 glucose 2 hours after oral glucose tolerance test  $\geq 200$  mg/dL.

34 **Results:** Of the 1289 participants, 234 (18%) had diabetes based on either capillary fasting blood  
35 glucose measurement (74, 32%) or the oral glucose tolerance test (160, 68%). The urine glucose  
36 test strip was 14% sensitive and 99% specific, and failed to identify 201 individuals with  
37 diabetes, while falsely identifying 7 without diabetes. Those missed by the urine glucose test  
38 strip had lower venous fasting blood glucose, lower venous blood glucose 2 hours after oral  
39 glucose tolerance test, and lower HbA1c compared with those correctly diagnosed.

40 **Conclusions:** Low cost, easy to use diabetes tools are essential for low-resource communities  
41 with minimal infrastructure. While the urine glucose test strip may identify persons with diabetes  
42 that might otherwise go undiagnosed in these settings, its poor sensitivity cannot be ignored. The  
43 massive burden of diabetes in low-resource settings demands improvements in test technologies.

44 **Keywords:** Diabetes, Low-resource settings, Diagnostics, Urine glucose test strip, Screening,

45

1  
2  
3 46 **Article Summary (word count: 2261)**  
4

5 47 ***Strengths and limitations of the study***  
6

- 7  
8 48 • This is one of the first studies to determine the prevalence of diabetes and report on the  
9  
10 49 screening accuracy of urine glucose test strips in Cambodia, which are commonly used as  
11  
12 50 screening tests in this setting.  
13  
14  
15 51 • We used a prospective community-based design and had a large sample size with high  
16  
17 52 participation rate, though participation bias towards those able to miss a day of work to  
18  
19 53 attend a clinic visit may still have been an issue.  
20  
21  
22 54 • Use of a composite reference test and not evaluating those with cFBG > 200 mg/dL by the  
23  
24 55 OGTT, could have affected our study results, though the use of OGTT allows comparison  
25  
26 56 of our results to those in a number of other studies.  
27  
28  
29 57 • The urine glucose test was self-administered and self reported, which is pragmatic and  
30  
31 58 aligns with the practices at MoPoTyso and other clinical settings in Cambodia, however  
32  
33 59 errors in interpreting the test result could influence accuracy.  
34  
35  
36  
37  
38

39 61 **Background**  
40

41 62 According to the International Diabetes Federation (IDF), 415 million adults are living with  
42  
43 63 diabetes globally, almost half of which are undiagnosed, and this number is expected to increase  
44  
45 64 to 642 million by 2040.[1] As is the case for most non-communicable diseases (NCDs), three  
46  
47 65 quarters of those affected live in low- and middle-income countries. In Cambodia for example,  
48  
49  
50 66 there are an estimated 230,000 people with diabetes, who are at risk for the associated micro- and  
51  
52 67 macrovascular complications of this disease, including cardiovascular disease (CVD).[1,2]  
53  
54  
55 68 Strategies to reduce CVD risk may also prevent and control diabetes, which would further reduce  
56  
57  
58  
59  
60

1  
2  
3 69 rates of eye, kidney, and neural damage due to diabetes complications.[3] To facilitate screening  
4  
5 70 and monitoring for diabetes in these low- and middle-income countries, a low-cost, point-of-care  
6  
7 71 diagnostic test that is resource and context appropriate is needed.  
8  
9  
10 72

11  
12 73 In low-resource settings, urine glucose test strips have been used as diabetes screening tools  
13  
14 74 because they are inexpensive, noninvasive, and easy to use.[4,5] While these tests do not require  
15  
16 75 fasting and are user friendly, they can only detect glucose after it has exceeded the threshold for  
17  
18 76 reabsorption by the kidneys and appears in the urine. The reported threshold varies and is  
19  
20 77 affected by kidney function.[6] Although their low sensitivity makes them inadequate for use as  
21  
22 78 a screening tool,[7-9] the World Health Organisation (WHO) acknowledges that they may have a  
23  
24 79 place in low resource settings where other tests are not possible and the prevalence of  
25  
26 80 undiagnosed diabetes may be high.[9] Currently many people are not diagnosed until severe  
27  
28 81 complications develop. Although the sensitivity of the urine test delays diagnosis relative to  
29  
30 82 other methods, it may provide an opportunity to reduce further advancement of complications.  
31  
32  
33  
34  
35  
36  
37  
38  
39  
40  
41  
42  
43  
44  
45  
46  
47  
48  
49  
50  
51  
52  
53

54 84 MoPoTsyo, a nongovernmental organization, provides screening and care services to people with  
55  
56 85 diabetes and hypertension in Cambodia through an innovative, community-based peer educator  
57  
58 86 model.[10-12] MoPoTsyo uses urine glucose test strips issued in the community and self-  
59  
60 87 administered by patients as the initial method of diabetes screening, which has allowed them to  
88  
89 88 screen over 700,000 adults, followed by confirmation with blood glucose testing for those who  
90  
91 89 have a positive urine test. The aim of this study was to determine the diagnostic accuracy of a  
92  
93 90 self-administered urine glucose test strip compared to alternative diabetes screening tools in a  
94  
95 91 low resource setting of Cambodia. We also explored whether individuals with diabetes who were

1  
2  
3 92 detected by urine glucose test strips differed in health status compared to those who were missed  
4  
5 93 by this test but detected by blood glucose measurement. Greater understanding of the  
6  
7  
8 94 performance of this test by the MoPoTsyo program will help to inform its optimal use.  
9  
10  
11

95

## 96 **Methods**

### 97 *Study design and procedures*

17 98 A prospective cross-sectional study was performed among members of the Borey Santhepheap  
18  
19 99 community in Cambodia (Phnom Penh Municipality, District Dangkao, Commune Chom Chao)  
20  
21 100 from November 2013 to October 2014. All households on randomly selected streets were invited  
22  
23  
24 101 to participate by a local peer educator, who described the study to all potential household  
25  
26 102 members. Adults at least 18 years of age living in the study area were eligible for inclusion.  
27  
28 103 Individuals were excluded if they had diabetes or hypertension or had taken medications for  
29  
30 104 diabetes and/or high blood pressure in the last 30 days, had kidney disease, or had received  
31  
32  
33 105 dialysis. Written informed consent was obtained from all participants. The protocol was approved  
34  
35 106 by the PATH Research Ethics Committee and the National Ethics Committee for Health  
36  
37  
38 107 Research (Cambodia Institutional Review Board). Study methods and results are reported in  
39  
40 108 alignment with the 2015 STARD recommendations.[13]  
41  
42  
43

109

44 110 After enrollment, all participants were screened for diabetes using a self-administered and self-  
45  
46 111 reported urine glucose test strip (Sichuan Medicines and Health Products, Chengdu, China).  
47  
48 112 Participants were taught how to use the test strip and read the results with assistance of a color  
49  
50 113 chart, and were given several ways to report results to their peer educator. All participants were  
51  
52  
53 114 then invited to attend the clinic following an 8-hour fast for laboratory confirmed tests for  
54  
55  
56  
57  
58  
59  
60

1  
2  
3 115 diabetes and associated co-morbid risk factors. Upon arriving at the clinic all participants  
4  
5 116 provided a urine sample, a venous blood sample, and a finger stick blood sample for capillary  
6  
7 117 fasting blood glucose measurement (cFBG) (On Call Plus glucometer, Acon Laboratories, San  
8  
9 118 Diego, USA, <https://www.aconlabs.com/us/glucose/on-call/plus-bgms/>). If the cFBG was less  
10  
11 119 than 200 mg/dL they were asked to consume a 75g oral glucose load for the oral glucose  
12  
13 120 tolerance test (OGTT). The oral glucose load was ingested within 5 minutes of starting  
14  
15 121 consumption, and two hours after ingestion, further venous blood and finger stick blood samples  
16  
17 122 were obtained for glucose measurements. During the visit, a health history was completed based  
18  
19 123 on the WHO STEPS surveillance questionnaire [14] and blood pressure measured by trained  
20  
21 124 clinical staff using an electronic device (Omron Corporation, Tokyo, Japan). All devices used in  
22  
23 125 the study were owned and used previously by MoPoTsyo within the guidelines of the Cambodian  
24  
25 126 Ministry of Health; none of the devices were investigational. Additional laboratory tests  
26  
27 127 performed included HbA1c (DCA Vantage Analyzer, Siemens AG, Germany), serum creatinine,  
28  
29 128 glucose, total cholesterol, high-density lipoprotein cholesterol, and triglycerides (Humalyzer  
30  
31 129 3000 Chemistry Analyzer, Human Diagnostics, Germany), spot urine creatinine, protein, and  
32  
33 130 albumin tests (Combilyzer dipstick reader, Human Diagnostics, Germany).

34  
35 131  
36  
37 132 A sample size of 1315 participants was calculated for a desired precision range of 10% and an  
38  
39 133 estimated sensitivity and specificity of the urine glucose test strip of 21% and 90%, respectively,  
40  
41 134 which is also sufficient for analysis of HbA1c, OGTT, and FBG as the test strip has the lowest  
42  
43 135 performance. The sample size for the study was calculated based on Buderer's formula [15],  
44  
45 136 accounting for a 3% drop-out rate and a 5% national prevalence of diabetes [16].  
46  
47  
48  
49  
50  
51  
52  
53  
54  
55  
56  
57  
58  
59  
60



### 138 ***Data Analysis***

139 The index tests of interest were a positive self-administered urine glucose test strip, HbA1c  
140 >6.5%, and cFBG  $\geq$ 126 mg/dL. Diagnostic accuracy was assessed against a composite reference  
141 standard, which was cFBG  $\geq$ 200 mg/dL, or venous blood glucose, 2 hours after OGTT  $\geq$ 200  
142 mg/dL.[17,18] If the participant's cFBG was >200 mg/dL, the patient was considered to have  
143 diabetes and an OGTT was not performed. Other measures were defined as follows: Overweight  
144 (BMI  $\geq$ 25 or waist circumference >90cm for men or >80cm for women[19]), elevated blood  
145 pressure (systolic pressure  $\geq$ 140mmHg or diastolic pressure  $\geq$ 90mmHg), albuminuria ( $\geq$ 20  
146 mg/L), and elevated albumin/creatinine ratio ( $\geq$ 30mg/g). We calculated sensitivity, specificity,  
147 positive predictive value (PPV), negative predictive value (NPV), positive likelihood ratio  
148 (LR+), negative LR (LR-),with 95% confidence intervals (CI).

149  
150 Subgroup analyses were not prespecified, and therefore used to explore the performance of the  
151 urine glucose test strip in participants at increased risk for diabetes mellitus (DM), including age  
152 ( $\geq$ 50 years), BMI ( $\geq$ 25), gender, and waist circumference (>90cm for men or >80cm for  
153 women). Logistic regression analyses were also used to determine if the diagnostic accuracy of  
154 the index test was impacted by these clinical features. Prevalence of diabetes by subgroup was  
155 compared by chi-squared test. We also explored whether the individuals correctly classified by  
156 the urine glucose test strip had better or worse controlled diabetes than those misclassified by the  
157 test, as defined by various clinical and laboratory measures. Mean values of continuous variables  
158 were compared using Student's t-test while proportions of dichotomous values were compared  
159 using the chi-squared test. Data were analyzed using Stata/SE 13.1 (StataCorp LP, Texas, USA).

160

## 161 **Results**

162 Of 1328 eligible study subjects, 1316 participated in the study and 1289 were included in the  
163 analysis (Figure 1). Participants were excluded from the analysis if they did not complete the  
164 OGTT due to vomiting or other reasons (16), were not fasting prior to the clinic visit (5), or  
165 reported taking medication for diabetes that day (6). Of the analyzed participants, 75%  
166 (972/1289) were female, mean age was 51 years, 31% had high BMI, and 13% had elevated  
167 blood pressure, although only 8% were taking antihypertensive medications. Characteristics of  
168 the participants included in the analysis are presented in Table 1.

169  
170 A total of 234 individuals had diabetes based on the composite reference standard of either cFBG  
171 (70, 30%) or OGTT (164, 70%), corresponding to a prevalence of 18%. The 70 individuals with  
172 cFBG  $\geq$ 200 mg/dL, also all had HbA1c measurements  $>$ 6.5%. Of the index tests evaluated, the  
173 urine glucose test strip had lower sensitivity (14.1%, 95% CI: 9.90-19.2) than cFBG (73.9%,  
174 95% CI: 67.8-79.4), and HbA1c (75.2%, 95% CI: 69.2-80.6). All three tests offered high  
175 specificity (99.3%, 95% CI: 98.6-99.7; 96.8%, 95% CI: 95.5-97.8; and 98.5%, 95% CI: 97.5-  
176 99.1; respectively) (Table 2). The urine glucose test strip failed to identify 201 individuals with  
177 diabetes (false negatives) and falsely identified seven participants without diabetes (false  
178 positives). The 201 patients with diabetes who were not identified by the urine test had  
179 significantly lower venous FBG, lower 2 hr OGTT, and lower HbA1c compared to those  
180 correctly diagnosed, but were similar in other characteristics (Table 3). The seven false positive  
181 individuals had higher HbA1c, higher systolic BP, and higher proportion receiving treatment for  
182 hypertension than those with true negative results (Table 3).

183

1  
2  
3 184 The prevalence of diabetes (diagnosed by the composite reference standard) was significantly  
4  
5 185 higher in participants who were 50 years of age or older compared to those under 50 years (24%  
6  
7 186 vs. 9.6%,  $p<0.001$ ); those with high BMI compared to those with normal BMI (22% vs. 17%,  
8  
9 187  $p=0.03$ ); and those with greater waist circumference compared to those with normal waist (24%  
10  
11 188 vs. 13%,  $p<0.001$ ), but was the same in males and females (Table 4). The diagnostic accuracy of  
12  
13 189 the urine glucose test strip was similar among subgroups of patients with various cofactors, with  
14  
15 190 overlapping confidence intervals (Table 4). Additionally, multivariate and univariate logistic  
16  
17 191 regression analyses also indicated that the diagnostic accuracy of the index test was not  
18  
19 192 significantly impacted by these cofactors.  
20  
21  
22  
23  
24 193

## 26 194 **Discussion**

27  
28 195 Urine glucose test strips had much lower sensitivity than either cFBG or HbA1c, but all three  
29  
30 196 tests offered high specificity. Patients who tested positive with the urine glucose test who were  
31  
32 197 confirmed to have diabetes by the reference standard (true positives) had higher FBG, higher  
33  
34 198 OGTT and higher HbA1c levels compared to the false negative group (urine test negative in  
35  
36 199 patients with diabetes), suggesting that the urine glucose test may identify individuals with poor  
37  
38 200 glycemic control. This suggests a subset of diabetes patients is being identified that may  
39  
40 201 potentially be at higher risk of advancing complications or comorbidities, and who may benefit  
41  
42 202 the most from further care [20]. In addition, testing for urine glucose was highly specific (99%),  
43  
44 203 with positive LRs in the 20s, indicating that when positive, this test is highly indicative of  
45  
46 204 diabetes.  
47  
48  
49  
50  
51 205

1  
2  
3 206 The prevalence of diabetes in the MoPoTsyo population in Cambodia was 18%. This is much  
4  
5 207 higher than the national prevalence for Cambodia, which is reported at 3.0%.[1] This may be due  
6  
7 208 to the high proportion of individuals over 50 years of age in our study population, which could  
8  
9 209 be explained by a participation bias towards those who were able to miss a day of work to attend  
10  
11 210 a clinic visit. Additionally, our study took place in a rapidly changing urban population, which  
12  
13 211 had a 2.4 times higher diabetes prevalence in the STEP survey, country report from 2010.[21]  
14  
15  
16  
17  
18

19 213 A wide range of sensitivities for the urine glucose test strip has been reported, and its use  
20  
21 214 remains controversial. A review in 2000 found six adequately designed studies that reported  
22  
23 215 performance of urine test strips for glucose.[8] Among these, sensitivities in two reports of  
24  
25 216 fasting patients were 16% and 35%; two using random samples found sensitivities of 18% and  
26  
27 217 64%; and three using postprandial and post-load measurements reported sensitivities between  
28  
29 218 39% and 48%. This review concluded that blood glucose measurements were preferred over  
30  
31 219 urinary glucose or HbA1c, and particularly, postprandial over fasting measures. Another review  
32  
33 220 found five studies reporting a range of sensitivity from 18% to 74% for urine glucose test  
34  
35 221 strips.[7] The review concluded that urine glucose test strips are not sufficient for screening for  
36  
37 222 diabetes.  
38  
39  
40  
41  
42  
43

44 224 This is one of the first studies to determine the prevalence of diabetes in Cambodia, and report on  
45  
46 225 the screening accuracy of urine glucose test strips which are commonly used as screening tests in  
47  
48 226 this setting. We used a prospective community-based design and had a large sample size with  
49  
50 227 high participation rate. The study had several limitations. Firstly, we used a composite reference  
51  
52 228 test and those with cFBG > 200 mg/dL were not evaluated by the OGTT. When evaluating the  
53  
54  
55  
56  
57  
58  
59  
60

1  
2  
3 229 index test of cFBG, the index test is included in the reference test, though at a different threshold,  
4  
5 230 which can cause incorporation bias resulting in an inflated test accuracy. While OGTT is  
6  
7  
8 231 considered the gold standard reference test for assessing diagnostic accuracy, there has been  
9  
10 232 some question of its performance. Two studies in China, each on more than 200 participants,  
11  
12 233 found that the reproducibility of the OGTT was 56% [22] and 66% [23]. Though our choice of  
13  
14 234 the reference standards, particularly OGTT, could have affected our study results, its use allows  
15  
16  
17 235 comparison of our results to those in a number of other studies. Second, the urine glucose test  
18  
19 236 was self-administered and self reported. While this was pragmatic, and aligns with the practices  
20  
21 237 at MoPoTyso and other clinical settings in Cambodia, errors in interpreting the test result could  
22  
23  
24 238 influence accuracy. We were not able to repeat this test when patients attended their clinic visit  
25  
26 239 as they were fasting at the clinic visit, and thus their urine would not have been the random non-  
27  
28 240 fasting urine test obtained at home. Third, we were not able to obtain hemoglobin levels (or test  
29  
30  
31 241 for hemoglobin variants) as these tests are not available in this setting, and hence cannot assess  
32  
33 242 the impact of anemia or hemoglobinopathy on test performance.[24] Fourth, glucose test strip  
34  
35 243 accuracy may be subject to effects of heat and humidity, we were not able to explore their  
36  
37  
38 244 possible impact on our results.

39  
40 245  
41  
42 246 For clinicians working in settings similar to ours, the question is how useful is the urine glucose  
43  
44 247 test as a screening or diagnostic test, and is it “better than nothing”? The low sensitivity certainly  
45  
46  
47 248 reduces the value of this test as a screening tool, but the high specificity means that positive tests  
48  
49 249 can be used to rule in patients with diabetes, suggesting that urine glucose may have some  
50  
51 250 diagnostic value in this setting. The false positive rate was extremely low, and only 7 patients  
52  
53  
54 251 without disease were identified as positive by urine glucose test strip. From a population

1  
2  
3 252 perspective, the value of a low cost, poorly sensitive yet highly specific test for diabetes is  
4  
5 253 unclear in terms of balancing the opportunity to identify a subset of patients with less well  
6  
7 254 controlled diabetes who would not have been identified otherwise, with the downside of a high  
8  
9  
10 255 false negative rate.[25]  
11

12 256  
13  
14 257 Not surprisingly, usability parameters and cost make urine glucose test strips a highly desirable  
15  
16 258 test in this and other low-resource settings.[9] Product attributes such as low complexity and  
17  
18 259 infrastructure requirements, short time to results, and low participant burden greatly contribute to  
19  
20 260 the acceptability and desirability of the screening tool. The large patient burden and the frequent  
21  
22 261 inability to comply with fasting requirements reduce the feasibility of using OGTT or FBG tests.  
23  
24 262 While HbA1c testing does not require fasting, current tests are too expensive for use in most  
25  
26 263 low-income countries. The role of a poorly sensitive test like urine glucose in resource poor  
27  
28 264 settings such as Cambodia is debatable, on the one hand the test will identify some patients  
29  
30 265 previously undiagnosed, and assuming treatment can be initiated, reduce severity of  
31  
32 266 complications from this disease. On the other hand, the test will miss the majority of patients  
33  
34 267 with diabetes, thus risking a false reassurance, further postponement of diagnosis, and risking  
35  
36 268 patient's respect for the health care system.  
37  
38  
39  
40  
41

42 269  
43  
44 270 There may be strategies to improve the performance (particularly sensitivity) of the urine glucose  
45  
46 271 test strip. First, using presence of risk factors such as high waist circumference or BMI, may  
47  
48 272 increase the pretest probability of diabetes and lead to improved performance. In our study, the  
49  
50 273 sensitivity of the UGTS among overweight men with high waist circumference was twice the  
51  
52 274 overall sensitivity (29% vs. 14% respectively). Second, using random, postprandial, or glucose-  
53  
54  
55  
56  
57  
58  
59  
60

1  
2  
3 275 loaded measurements may be superior than fasting because the renal threshold for glucose is  
4  
5 276 more often reached in non-fasting states.[8] Third, improving the limit of detection may be  
6  
7 277 possible by modifications in the test strip itself, or improvement in the way it is read either  
8  
9 278 manually (with trained users) or automatically (with electronic reading devices). Finally,  
10  
11 279 increasing screening frequency may be feasible in low resource settings, if the urine glucose test  
12  
13 280 strip truly does identify a smaller but more advanced fraction of diabetes patients.  
14  
15  
16  
17  
18

## 19 282 **Conclusion**

20  
21 283 Low cost, easy to use diabetes screening, diagnosis, and monitoring tools are essential for low-  
22  
23 284 resource communities with minimal infrastructure. While the urine glucose test strip has some  
24  
25 285 value as a screening test in these settings, its performance is far from optimal. Progress is  
26  
27 286 urgently needed to improve the performance, availability, and access of essential testing  
28  
29 287 technologies for diabetes.  
30  
31  
32

33 288

34  
35 289

## 36 37 290 **List of abbreviations**

38 291 urine glucose test strip (UGTS)

39  
40 292 International Diabetes Federation (IDF)

41  
42 293 non-communicable diseases (NCDs)

43  
44 294 cardiovascular disease (CVD)

45  
46 295 World Health Organisation (WHO)

47  
48 296 capillary fasting blood glucose measurement (cFBG)

49  
50 297 oral glucose tolerance test (OGTT)  
51  
52  
53  
54  
55  
56  
57  
58  
59  
60

1  
2  
3 298 positive predictive value (PPV)  
4

5 299 negative predictive value (NPV)  
6

7  
8 300 positive likelihood ratio (LR+)  
9

10 301 negative likelihood ratio (LR-)  
11

12 302 confidence intervals (CI)  
13

14 303 diabetes mellitus (DM)  
15

16  
17 304

18  
19 305 **Declarations**  
20

21 306 *Ethical approval and consent to participate*  
22

23  
24 307 The protocol was approved by the PATH Research Ethics Committee and the National Ethics  
25  
26 308 Committee for Health Research (Cambodia Institutional Review Board). Informed consent was  
27  
28 309 obtained from all participants.  
29

30  
31 310 *Consent for publication*  
32

33 311 Not applicable.  
34

35 312 *Availability of data and material*  
36

37 313 The datasets used during the current study are available from the corresponding author on  
38  
39 314 reasonable request.  
40

41  
42 315 *Competing Interests*  
43

44 316 The authors declare that they have no competing interests.  
45

46  
47 317 *Funding*  
48

49 318 This work was supported by a grant from Medtronic Foundation, and received additional support  
50  
51 319 from PATH and the University of Washington Department of Family Medicine. The funding  
52  
53  
54  
55  
56  
57  
58  
59  
60



320 source had no involvement in study design, data collection, data analysis, data interpretation,  
 321 writing of the manuscript, or the decision to publish the results.

### 322 *Authors contributions*

323 MHP, SB, TN, HM and BW designed the study; MHP, SB, TN, and BW implemented the study;  
 324 HLS, MT, HM, and BW analysed and interpreted the data; HLS, MHP, FD, MT, HM, and BW  
 325 contributed to writing. All authors read and approved the final manuscript.

### 326 *Acknowledgements*

327 We would like to acknowledge the Borey Santhepheap community in Cambodia (Phnom Penh  
 328 Municipality, District Dangkao, Commune Chom Chao) for participating in this study. We also  
 329 acknowledge the input of Dr Annette Fitzpatrick and Dr Jim LoGerfo from the University of  
 330 Washington.

### 331 *Authors' information*

332 Not applicable.

333

334

## 335 **Tables**

336

337 **Table 1.** Characteristics of included participants.

|                                                   | Mean (SD) or %<br>n=1289 |
|---------------------------------------------------|--------------------------|
| Age, years                                        | 51.4 (14.9)              |
| Female (%)                                        | 75.4                     |
| BMI <sup>1</sup>                                  | 23.2 (4.1)               |
| High BMI (%)                                      | 30.5                     |
| Waist circumference above cutoff <sup>2</sup> (%) | 46.1                     |
| Systolic blood pressure, mmHg                     | 123.5 (20.6)             |
| Diastolic blood pressure, mmHg                    | 80.8 (12.1)              |
| Elevated blood pressure (%)                       | 12.9                     |
| Take treatment for high blood pressure (%)        | 8.2                      |

338 <sup>1</sup> n=1288

339 <sup>2</sup> >90cm for men, >80cm for women. [19]

340

341

**Table 2.** Diagnostic accuracy of urine glucose test strip, capillary fasting glucose, and HbA1c determined by comparison with the composite reference standard (n=1289)<sup>1</sup>.

|                                               | Urine glucose test strip positive | cFBG $\geq$ 126 mg/dL | HbA1c $>$ 6.5%    |
|-----------------------------------------------|-----------------------------------|-----------------------|-------------------|
| True positive (n)                             | 33                                | 173                   | 176               |
| False positive (n)                            | 7                                 | 34                    | 16                |
| False negative (n)                            | 201                               | 61                    | 58                |
| True negative (n)                             | 1048                              | 1021                  | 1039              |
| True diabetes prevalence <sup>2</sup> (95%CI) | 18%, 234/1289 (16, 20.4)          |                       |                   |
| Sensitivity (95% CI)                          | 14.1 (9.90, 19.2)                 | 73.9 (67.8, 79.4)     | 75.2 (69.2, 80.6) |
| Specificity (95% CI)                          | 99.3 (98.6, 99.7)                 | 96.8 (95.5, 97.8)     | 98.5 (97.5, 99.1) |
| Positive PV (95% CI)                          | 82.5 (67.2, 92.7)                 | 83.6 (77.8, 88.3)     | 91.7 (86.8, 95.2) |
| Negative PV (95% CI)                          | 83.9 (81.7, 85.9)                 | 94.4 (92.8, 95.7)     | 94.7 (93.2, 96.0) |
| Positive LR (95% CI)                          | 21.3 (9.50, 47.5)                 | 22.9 (16.3, 32.2)     | 49.6 (30.3, 81.1) |
| Negative LR (95% CI)                          | 0.90 (0.80, 0.90)                 | 0.30 (0.20, 0.30)     | 0.30 (0.20, 0.30) |

<sup>1</sup> Excludes individuals taking diabetes treatment that day (n=6), did not fast before OGTT as instructed (n=5), or did not complete the OGTT (n=16).

<sup>2</sup> Composite reference standard: OGTT  $\geq$ 200 mg/dL or cFBG  $\geq$ 200 mg/dL. 70 patients with cFBG  $\geq$ 200 were not tested by OGTT.

**Table 3.** Diagnostic accuracy of the urine glucose test strip by patient characteristics.

| Patient characteristic: Mean (SD) or %     | Diabetic <sup>1</sup> |                      | Non-diabetic <sup>1</sup> |                      |
|--------------------------------------------|-----------------------|----------------------|---------------------------|----------------------|
|                                            | True Positive n=33    | False Negative n=201 | False Positive n=7        | True Negative n=1048 |
| Age                                        | 57 (9.3)              | 58 (10.5)            | 56 (11.9)                 | 50 (15.5)            |
| Female (%)                                 | 81.8                  | 74.6                 | 85.7                      | 75.3                 |
| Venous fasting blood glucose               | <b>207 (75.3)</b>     | <b>166 (73.2)</b>    | 95 (16.9)                 | 90 (13.1)            |
| Venous blood glucose 2 hrs after OGTT      | <b>310 (60.8)</b>     | <b>275 (62.2)</b>    | 115 (43.2)                | 120 (31.0)           |
| Change in venous blood glucose during OGTT | 160 (50.8)            | 146 (49.8)           | 20 (47.7)                 | 30 (30.0)            |
| HbA1c                                      | <b>10 (2.3)</b>       | <b>8 (2.4)</b>       | <b>6 (0.7)</b>            | <b>5 (0.5)</b>       |
| BMI                                        | 24 (3.9)              | 24 (3.9)             | 26 (3.2)                  | 23 (4.1)             |
| High BMI (%)                               | 33.3                  | 36.8                 | 57.1                      | 29.0                 |
| Waist circumference above cutoff (%)       | 60.6                  | 61.7                 | 71.4                      | 42.8                 |
| Systolic blood pressure                    | 132 (24.9)            | 130 (20.6)           | <b>146 (14.0)</b>         | <b>122 (20.2)</b>    |
| Diastolic blood pressure                   | 85 (9.6)              | 84 (11.7)            | 87 (6.5)                  | 80 (12.1)            |
| Elevated blood pressure (%)                | 15.2                  | 20.9                 | 14.3                      | 11.3                 |
| Take treatment for high blood pressure (%) | 18.2                  | 11.4                 | <b>28.6</b>               | <b>7.1</b>           |
| Total Cholesterol                          | 242 (62.3)            | 227 (69.8)           | 240 (63.1)                | 213 (56.3)           |
| Proteinuria (n=1116) <sup>2</sup> (%)      | 20.0                  | 17.2                 | 0                         | 3.0                  |
| Albuminuria (%)                            | 51.5                  | 47.8                 | 14.3                      | 21.7                 |
| Abnormal albumin/creatinine ratio (%)      | 39.3                  | 39.3                 | 14.3                      | 17.3                 |

<sup>1</sup> Diagnosis by the composite reference standard: venous OGTT  $\geq$ 200 mg/dL or cFBG  $\geq$ 200 mg/dL. 70 patients with cFBG  $\geq$ 200 were not tested by OGTT.

<sup>2</sup> 4 missing values, 169 indeterminate measurements not included in analysis.

359 **Bold = significantly different ( $p \leq 0.05$ ) by Student's t-test or chi-squared test.**

360

361

362 **Table 4.** Diagnostic accuracy of urine glucose test strip by participant cofactors (n=1289) <sup>1</sup>.

363

| Results                                      | Cofactors                             |                                       |                                       |                                       |                         |                         |                                       |                                       |
|----------------------------------------------|---------------------------------------|---------------------------------------|---------------------------------------|---------------------------------------|-------------------------|-------------------------|---------------------------------------|---------------------------------------|
|                                              | Age                                   |                                       | BMI <sup>3</sup>                      |                                       | Gender                  |                         | Waist circumference <sup>4</sup>      |                                       |
|                                              | <50                                   | ≥50                                   | <25                                   | ≥25                                   | Male                    | Female                  | Normal                                | High                                  |
| <b>Number of participants</b>                | 531                                   | 758                                   | 895                                   | 393                                   | 317                     | 972                     | 691                                   | 598                                   |
| <b>True positive (n)</b>                     | 8                                     | 25                                    | 22                                    | 11                                    | 6                       | 27                      | 13                                    | 20                                    |
| <b>False positive (n)</b>                    | 3                                     | 4                                     | 3                                     | 4                                     | 1                       | 6                       | 2                                     | 5                                     |
| <b>False negative (n)</b>                    | 43                                    | 158                                   | 127                                   | 74                                    | 51                      | 150                     | 77                                    | 124                                   |
| <b>True negative (n)</b>                     | 477                                   | 571                                   | 743                                   | 304                                   | 259                     | 789                     | 599                                   | 449                                   |
| <b>True diabetes prevalence <sup>2</sup></b> | <b>9.6%</b><br>(7.2,<br><b>12.4</b> ) | <b>24%</b><br>(21.0,<br><b>27.4</b> ) | <b>17%</b><br>(14.0,<br><b>19.3</b> ) | <b>22%</b><br>(18.0,<br><b>26.0</b> ) | 18%<br>(14.0,<br>22.7)  | 18%<br>(16.0,<br>20.8)  | <b>13%</b><br>(11.0,<br><b>15.8</b> ) | <b>24%</b><br>(21.0,<br><b>27.7</b> ) |
| <b>Sensitivity (95% CI)</b>                  | 15.7<br>(7.0,<br>28.6)                | 13.7<br>(9.0,<br>19.5)                | 14.8<br>(9.5,<br>21.5)                | 12.9<br>(6.6,<br>22.0)                | 10.5<br>(4.0,<br>21.5)  | 15.3<br>(10.3,<br>21.4) | 14.4<br>(7.9,<br>23.4)                | 13.9<br>(8.7,<br>20.6)                |
| <b>Specificity (95% CI)</b>                  | 99.4<br>(98.2,<br>99.9)               | 99.3<br>(98.2,<br>99.8)               | 99.6<br>(98.8,<br>99.9)               | 98.7<br>(96.7,<br>99.6)               | 99.6<br>(97.9,<br>100)  | 99.2<br>(98.4,<br>99.7) | 99.7<br>(98.8,<br>100)                | 98.9<br>(97.4,<br>99.6)               |
| <b>Positive PV (95% CI)</b>                  | 72.7<br>(39,<br>94.0)                 | 86.2<br>(68.3,<br>96.1)               | 88<br>(68.8,<br>97.5)                 | 73.3<br>(44.96,<br>92.2)              | 85.7<br>(42.1,<br>99.6) | 81.8<br>(64.5,<br>93.0) | 86.7<br>(59.5,<br>98.3)               | 80<br>(59.3,<br>93.2)                 |
| <b>Negative PV (95% CI)</b>                  | 91.7<br>(89, 94)                      | 78.3<br>(75.2,<br>81.3)               | 85.4<br>(82.9,<br>87.7)               | 80.4<br>(76.1,<br>84.3)               | 83.5<br>(78.9,<br>87.5) | 84<br>(81.5,<br>86.3)   | 88.6<br>(86,<br>90.9)                 | 78.4<br>(74.8,<br>81.7)               |
| <b>Positive LR (95% CI)</b>                  | 25.1<br>(6.9,<br>91.6)                | 19.6<br>(6.9,<br>55.7)                | 36.7<br>(11.1,<br>121)                | 10.0<br>(3.3,<br>30.5)                | 27.4<br>(3.4,<br>223)   | 20.2<br>(8.5,<br>48.2)  | 43.4<br>(10.0,<br>189)                | 12.6<br>(4.8, 33)                     |
| <b>Negative LR (95% CI)</b>                  | 0.8<br>(0.8,<br>1.0)                  | 0.9<br>(0.8,<br>0.9)                  | 0.9<br>(0.8,<br>0.9)                  | 0.9<br>(0.8,<br>1.0)                  | 0.9<br>(0.8,<br>1.0)    | 0.85<br>(0.80,<br>0.91) | 0.86<br>(0.79,<br>0.94)               | 0.87<br>(0.82,<br>0.93)               |

364

365 <sup>1</sup> Excludes individuals taking diabetes treatment that day (n=6), did not fast before OGTT as instructed (n=5), or did not complete the OGTT (n=16).

366 <sup>2</sup> Composite reference standard: OGTT  $\geq 200$  mg/dL or cFBG  $\geq 200$  mg/dL. 70 patients with cFBG  $\geq 200$  were not tested by OGTT.

367 <sup>3</sup> n=1288.

368 <sup>4</sup> High Waist circumference =  $>90$ cm for men,  $>80$ cm for women.[19]

369 **Bold = significantly different ( $p \leq 0.05$ ), chi-squared test.**

370

371

372

373

374

## Figure legend

375

376

**Figure 1:** Study flow diagram.

377

378

## Reference List

1. IDF Diabetes Atlas, 7th Edition. International Diabetes Federation . 2015. International Diabetes Federation.  
Ref Type: Electronic Citation
2. Forbes JM, Cooper ME: **Mechanisms of diabetic complications.** *Physiol Rev* 2013, **93(1)**: 137-188.
3. Tuomilehto J, Lindstrom J, Eriksson JG, Valle TT, Hamalainen H, Ilanne-Parikka P *et al.*: **Prevention of type 2 diabetes mellitus by changes in lifestyle among subjects with impaired glucose tolerance.** *N Engl J Med* 2001, **344**: 1343-1350.
4. Dyerberg J, Pedersen L, Aagaard O: **Evaluation of a dipstick test for glucose in urine.** *Clin Chem* 1976, **22**: 205-210.
5. van der Sande MA, Walraven GE, Bailey R, Rowley JT, Banya WA, Nyan OA *et al.*: **Is there a role for glycosuria testing in sub-Saharan Africa?** *Trop Med Int Health* 1999, **4**: 506-513.
6. Taal MW, Chertow GM, Marsden PA, Skorecki K, Yu ASL, Brenner BM: **Laboratory Assessment of Kidney Disease: Glomerular Filtration Rate, Urinalysis, and Proteinuria.** In *Brenner & Rector's The Kidney*. Philadelphia: Elsevier; 2012.
7. Wei OY, Teece S: **Best evidence topic report. Urine dipsticks in screening for diabetes mellitus.** *Emerg Med J* 2006, **23**: 138.
8. Engelgau MM, Narayan KM, Herman WH: **Screening for type 2 diabetes.** *Diabetes Care* 2000, **23**: 1563-1580.
9. World Health Organization. Screening for Type 2 Diabetes. Report of a World Health Organization and International Diabetes Federation meeting. 2003. Geneva, Switzerland, World Health Organization.  
Ref Type: Report
10. van Pelt M: **Improving access to education and care in Cambodia.** *Diabetes Voice* 2009, **54**.
11. Taniguchi D, LoGerfo J, van PM, Mielcarek B, Huster K, Haider M *et al.*: **Evaluation of a multi-faceted diabetes care program including community-based peer educators in Takeo province, Cambodia, 2007-2013.** *PLoS One* 2017, **12**: e0181582.
12. van Olmen J, Eggermont N, van Pelt M, Hen H, de Man J, Schellevis F *et al.*: **Patient-centred innovation to ensure access to diabetes care in Cambodia: the case of MoPoTsyo.** *J Pharm Policy Pract* 2016, **9**: 1.
13. Bossuyt PM, Reitsma JB, Bruns DE, Gatsonis CA, Glasziou PP, Irwig L *et al.*: **STARD 2015: an updated list of essential items for reporting diagnostic accuracy studies.** *BMJ* 2015, **351**: h5527.

- 1  
2  
3 417 14. World Health Organization. WHO STEPS Surveillance Manual. World Health Organization . 6-13-  
4 418 2008. World Health Organization. 4-30-2015.  
5 419 Ref Type: Electronic Citation  
6
- 7 420 15. Obuchowski NA: **Sample size calculations in studies of test accuracy.** *Stat Methods Med Res*  
8 421 1998, **7**: 371-392.  
9
- 10 422 16. King H, Keuky L, Seng S, Khun T, Roglic G, Pinget M: **Diabetes and associated disorders in**  
11 423 **Cambodia: two epidemiological surveys.** *Lancet* 2005, **366**: 1633-1639.  
12
- 13 424 17. **Standards of Medical Care in Diabetes-2016 Abridged for Primary Care Providers.** *Clin*  
14 425 *Diabetes* 2016, **34**: 3-21.  
15
- 16 426 18. Bartoli E, Fra GP, Carnevale Schianca GP: **The oral glucose tolerance test (OGTT) revisited.**  
17 427 *Eur J Intern Med* 2011, **22**: 8-12.  
18
- 19 428 19. World Health Organization. Waist circumference and waist-hip ratio: report of a WHO expert  
20 429 consultation, Geneva, 8-11 December 2008. 2011. Geneva, Switzerland, World Health  
21 430 Organization.  
22 431 Ref Type: Report  
23 431  
24
- 25 432 20. **The effect of intensive treatment of diabetes on the development and progression of long-term**  
26 433 **complications in insulin-dependent diabetes mellitus. The Diabetes Control and**  
27 434 **Complications Trial Research Group.** *N Engl J Med* 1993, **329**: 977-986.  
28
- 29 435 21. University of Health Sciences Cambodia, Ministry of Health Cambodia. Prevalence of non-  
30 436 communicable disease risk factors in Cambodia; STEPS Survey Country Report. 2010.  
31 437 Ref Type: Report  
32
- 33 438 22. Liu M, Pan CY, Jin MM, Su HY, Lu JM: **[The reproducibility and clinical significance of oral**  
34 439 **glucose tolerance test for abnormal glucose metabolism].** *Zhonghua Nei Ke Za Zhi* 2007, **46**:  
35 440 1007-1010.  
36
- 37 441 23. Ko GT, Chan JC, Woo J, Lau E, Yeung VT, Chow CC *et al.*: **The reproducibility and usefulness**  
38 442 **of the oral glucose tolerance test in screening for diabetes and other cardiovascular risk**  
39 443 **factors.** *Ann Clin Biochem* 1998, **35 ( Pt 1)**: 62-67.  
40
- 41 444 24. English E, Idris I, Smith G, Dhatariya K, Kilpatrick ES, John WG: **The effect of anaemia and**  
42 445 **abnormalities of erythrocyte indices on HbA1c analysis: a systematic review.** *Diabetologia*  
43 446 2015, **58**: 1409-1421.  
44
- 45 447 25. Flessa S, Zembok A: **Costing of diabetes mellitus type II in Cambodia.** *Health Econ Rev* 2014,  
46 448 **4**: 24.  
47 448  
48 449  
49 450  
50 451  
51 452  
52  
53  
54  
55  
56  
57  
58  
59  
60

1  
2  
3  
4  
5  
6  
7  
8  
9  
10  
11  
12  
13  
14  
15  
16  
17  
18  
19  
20  
21  
22  
23  
24  
25  
26  
27  
28  
29  
30  
31  
32  
33  
34  
35  
36  
37  
38  
39  
40  
41  
42  
43  
44  
45  
46  
47  
48  
49  
50  
51  
52  
53  
54  
55  
56  
57  
58  
59  
60

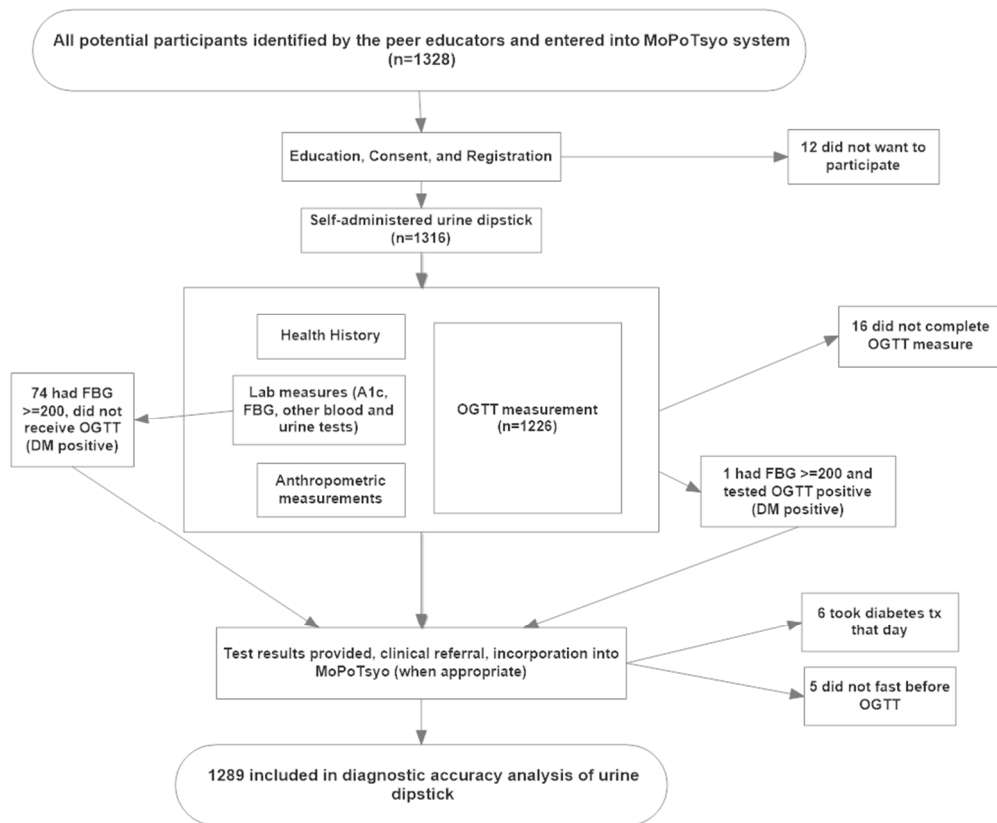

86x71mm (300 x 300 DPI)

Peer Review Only

| Section & Topic          | No  | Item                                                                                                                                                   | Reported on page # |
|--------------------------|-----|--------------------------------------------------------------------------------------------------------------------------------------------------------|--------------------|
| <b>TITLE OR ABSTRACT</b> |     |                                                                                                                                                        |                    |
|                          | 1   | Identification as a study of diagnostic accuracy using at least one measure of accuracy (such as sensitivity, specificity, predictive values, or AUC)  | 1                  |
| <b>ABSTRACT</b>          |     |                                                                                                                                                        |                    |
|                          | 2   | Structured summary of study design, methods, results, and conclusions (for specific guidance, see STARD for Abstracts)                                 | 1                  |
| <b>INTRODUCTION</b>      |     |                                                                                                                                                        |                    |
|                          | 3   | Scientific and clinical background, including the intended use and clinical role of the index test                                                     | 3                  |
|                          | 4   | Study objectives and hypotheses                                                                                                                        | 4                  |
| <b>METHODS</b>           |     |                                                                                                                                                        |                    |
| <i>Study design</i>      | 5   | Whether data collection was planned before the index test and reference standard were performed (prospective study) or after (retrospective study)     | 5                  |
| <i>Participants</i>      | 6   | Eligibility criteria                                                                                                                                   | 5                  |
|                          | 7   | On what basis potentially eligible participants were identified (such as symptoms, results from previous tests, inclusion in registry)                 | 5                  |
|                          | 8   | Where and when potentially eligible participants were identified (setting, location and dates)                                                         | 5                  |
|                          | 9   | Whether participants formed a consecutive, random or convenience series                                                                                | 5                  |
| <i>Test methods</i>      | 10a | Index test, in sufficient detail to allow replication                                                                                                  | 5                  |
|                          | 10b | Reference standard, in sufficient detail to allow replication                                                                                          | 6                  |
|                          | 11  | Rationale for choosing the reference standard (if alternatives exist)                                                                                  | 6                  |
|                          | 12a | Definition of and rationale for test positivity cut-offs or result categories of the index test, distinguishing pre-specified from exploratory         | 6                  |
|                          | 12b | Definition of and rationale for test positivity cut-offs or result categories of the reference standard, distinguishing pre-specified from exploratory | 6                  |
|                          | 13a | Whether clinical information and reference standard results were available to the performers/readers of the index test                                 | 6                  |
|                          | 13b | Whether clinical information and index test results were available to the assessors of the reference standard                                          | 6                  |
| <i>Analysis</i>          | 14  | Methods for estimating or comparing measures of diagnostic accuracy                                                                                    | 7                  |
|                          | 15  | How indeterminate index test or reference standard results were handled                                                                                | 7                  |
|                          | 16  | How missing data on the index test and reference standard were handled                                                                                 | 7                  |
|                          | 17  | Any analyses of variability in diagnostic accuracy, distinguishing pre-specified from exploratory                                                      | 7                  |
|                          | 18  | Intended sample size and how it was determined                                                                                                         | 6                  |
| <b>RESULTS</b>           |     |                                                                                                                                                        |                    |
| <i>Participants</i>      | 19  | Flow of participants, using a diagram                                                                                                                  | 17                 |
|                          | 20  | Baseline demographic and clinical characteristics of participants                                                                                      | 15                 |
|                          | 21a | Distribution of severity of disease in those with the target condition                                                                                 | 15                 |
|                          | 21b | Distribution of alternative diagnoses in those without the target condition                                                                            | NA                 |
|                          | 22  | Time interval and any clinical interventions between index test and reference standard                                                                 | 5                  |
| <i>Test results</i>      | 23  | Cross tabulation of the index test results (or their distribution) by the results of the reference standard                                            | 15                 |
|                          | 24  | Estimates of diagnostic accuracy and their precision (such as 95% confidence intervals)                                                                | 15                 |
|                          | 25  | Any adverse events from performing the index test or the reference standard                                                                            | NA                 |
| <b>DISCUSSION</b>        |     |                                                                                                                                                        |                    |
|                          | 26  | Study limitations, including sources of potential bias, statistical uncertainty, and generalisability                                                  | 10                 |
|                          | 27  | Implications for practice, including the intended use and clinical role of the index test                                                              | 11                 |
| <b>OTHER INFORMATION</b> |     |                                                                                                                                                        |                    |
|                          | 28  | Registration number and name of registry                                                                                                               | NA                 |
|                          | 29  | Where the full study protocol can be accessed                                                                                                          | NA                 |
|                          | 30  | Sources of funding and other support; role of funders                                                                                                  | 14                 |



# STARD 2015

---

## AIM

STARD stands for “Standards for Reporting Diagnostic accuracy studies”. This list of items was developed to contribute to the completeness and transparency of reporting of diagnostic accuracy studies. Authors can use the list to write informative study reports. Editors and peer-reviewers can use it to evaluate whether the information has been included in manuscripts submitted for publication.

---

## EXPLANATION

A **diagnostic accuracy study** evaluates the ability of one or more medical tests to correctly classify study participants as having a **target condition**. This can be a disease, a disease stage, response or benefit from therapy, or an event or condition in the future. A medical test can be an imaging procedure, a laboratory test, elements from history and physical examination, a combination of these, or any other method for collecting information about the current health status of a patient.

The test whose accuracy is evaluated is called **index test**. A study can evaluate the accuracy of one or more index tests. Evaluating the ability of a medical test to correctly classify patients is typically done by comparing the distribution of the index test results with those of the **reference standard**. The reference standard is the best available method for establishing the presence or absence of the target condition. An accuracy study can rely on one or more reference standards.

If test results are categorized as either positive or negative, the cross tabulation of the index test results against those of the reference standard can be used to estimate the **sensitivity** of the index test (the proportion of participants *with* the target condition who have a positive index test), and its **specificity** (the proportion *without* the target condition who have a negative index test). From this cross tabulation (sometimes referred to as the contingency or “2x2” table), several other accuracy statistics can be estimated, such as the positive and negative **predictive values** of the test. Confidence intervals around estimates of accuracy can then be calculated to quantify the statistical **precision** of the measurements.

If the index test results can take more than two values, categorization of test results as positive or negative requires a **test positivity cut-off**. When multiple such cut-offs can be defined, authors can report a receiver operating characteristic (ROC) curve which graphically represents the combination of sensitivity and specificity for each possible test positivity cut-off. The **area under the ROC curve** informs in a single numerical value about the overall diagnostic accuracy of the index test.

The **intended use** of a medical test can be diagnosis, screening, staging, monitoring, surveillance, prediction or prognosis. The **clinical role** of a test explains its position relative to existing tests in the clinical pathway. A replacement test, for example, replaces an existing test. A triage test is used before an existing test; an add-on test is used after an existing test.

Besides diagnostic accuracy, several other outcomes and statistics may be relevant in the evaluation of medical tests. Medical tests can also be used to classify patients for purposes other than diagnosis, such as staging or prognosis. The STARD list was not explicitly developed for these other outcomes, statistics, and study types, although most STARD items would still apply.

---

## DEVELOPMENT

This STARD list was released in 2015. The 30 items were identified by an international expert group of methodologists, researchers, and editors. The guiding principle in the development of STARD was to select items that, when reported, would help readers to judge the potential for bias in the study, to appraise the applicability of the study findings and the validity of conclusions and recommendations. The list represents an update of the first version, which was published in 2003.

More information can be found on <http://www.equator-network.org/reporting-guidelines/stard>.

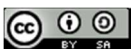



# BMJ Open

## Diagnostic accuracy of self-administered urine glucose test strips as a diabetes screening tool in a low-resource setting in Cambodia

|                                    |                                                                                                                                                                                                                                                                                                         |
|------------------------------------|---------------------------------------------------------------------------------------------------------------------------------------------------------------------------------------------------------------------------------------------------------------------------------------------------------|
| Journal:                           | <i>BMJ Open</i>                                                                                                                                                                                                                                                                                         |
| Manuscript ID                      | bmjopen-2017-019924.R2                                                                                                                                                                                                                                                                                  |
| Article Type:                      | Research                                                                                                                                                                                                                                                                                                |
| Date Submitted by the Author:      | 16-Feb-2018                                                                                                                                                                                                                                                                                             |
| Complete List of Authors:          | Storey, Helen; PATH, Diagnostics<br>van Pelt, Maurits; MoPoTsyo<br>Bun, Socheath; MoPoTsyo<br>Daily, Frances; MoPoTsyo<br>Neogi, Tina; PATH<br>Thompson, Matthew; University of Washington, Department of Family<br>Medicine<br>McGuire, Helen; PATH, Noncommunicable Diseases<br>Weigl, Bernhard; PATH |
| <b>Primary Subject<br>Heading</b>: | Diabetes and endocrinology                                                                                                                                                                                                                                                                              |
| Secondary Subject Heading:         | Diagnostics, Global health                                                                                                                                                                                                                                                                              |
| Keywords:                          | Low-resource settings, Diabetes, Diagnostics, Urine glucose test strip,<br>Screening                                                                                                                                                                                                                    |
|                                    |                                                                                                                                                                                                                                                                                                         |

SCHOLARONE™  
Manuscripts

1  
2  
3  
4 1 **Diagnostic accuracy of self-administered urine glucose test strips as**  
5  
6  
7 2 **a diabetes screening tool in a low-resource setting in Cambodia**  
8  
9  
10 3

11 4 Helen L. Storey; PATH, Seattle WA 98109, USA; hstorey@path.org

12  
13 5 Maurits H. van Pelt; MoPoTsyo, Phnom Penh, Cambodia; mopotsyo@gmail.com

14  
15  
16 6 Socheath Bun; MoPoTsyo, Phnom Penh, Cambodia; mopo.medtrainer@gmail.com

17  
18 7 Frances Daily; MoPoTsyo, Phnom Penh, Cambodia; fdaily@bigpond.com

19  
20 8 Tina Neogi<sup>1</sup>; PATH, Seattle WA 98109, USA; tinaneogi@gmail.com

21  
22  
23 9 Matthew Thompson; Department of Family Medicine, University of Washington, Seattle WA  
24  
25 10 98195, USA; mjt@uw.edu

26  
27 11 Helen McGuire; PATH, Washington DC 20001, USA; hmcguire@path.org

28  
29 12 Bernhard H Weigl<sup>2</sup>; PATH, Seattle WA 98109, USA; bweigl@intven.com

30  
31  
32  
33  
34 14 \* Corresponding author: Helen McGuire, PATH, PO Box 900922 Seattle WA 98109,  
35  
36 15 [hmcguire@path.org](mailto:hmcguire@path.org), 202-540-4360

37  
38  
39 16 <sup>1</sup> Present Address: UW Neighborhood Ravenna Clinic, Seattle WA 98105

40  
41 17 <sup>2</sup> Present Address: Intellectual Ventures/Global Good, Bellevue WA 98005, USA

42  
43  
44  
45  
46  
47  
48 20 **Abstract** (word count: 287)

49  
50 21 **Objective:** Screening for diabetes in low resource countries is a growing challenge, necessitating  
51  
52 22 tests that are resource and context appropriate. The aim of this study was to determine the  
53  
54  
55  
56  
57  
58  
59  
60

23 diagnostic accuracy of a self-administered urine glucose test strip compared to alternative  
24 diabetes screening tools in a low resource setting of Cambodia.

25 **Design:** Prospective cross-sectional study

26 **Setting:** Members of the Borey Santhepheap community in Cambodia (Phnom Penh  
27 Municipality, District Dangkao, Commune Chom Chao).

28 **Participants:** All households on randomly selected streets were invited to participate, and adults  
29 at least 18 years of age living in the study area were eligible for inclusion.

30 **Outcomes:** The accuracy of self-administered urine glucose test strip positivity, HbA1c >6.5%,  
31 and capillary fasting blood glucose measurement  $\geq 126$  mg/dL were assessed against a composite  
32 reference standard of capillary fasting blood glucose measurement  $\geq 200$  mg/dL or venous blood  
33 glucose 2 hours after oral glucose tolerance test  $\geq 200$  mg/dL.

34 **Results:** Of the 1289 participants, 234 (18%) had diabetes based on either capillary fasting blood  
35 glucose measurement (74, 32%) or the oral glucose tolerance test (160, 68%). The urine glucose  
36 test strip was 14% sensitive and 99% specific, and failed to identify 201 individuals with  
37 diabetes, while falsely identifying 7 without diabetes. Those missed by the urine glucose test  
38 strip had lower venous fasting blood glucose, lower venous blood glucose 2 hours after oral  
39 glucose tolerance test, and lower HbA1c compared with those correctly diagnosed.

40 **Conclusions:** Low cost, easy to use diabetes tools are essential for low-resource communities  
41 with minimal infrastructure. While the urine glucose test strip may identify persons with diabetes  
42 that might otherwise go undiagnosed in these settings, its poor sensitivity cannot be ignored. The  
43 massive burden of diabetes in low-resource settings demands improvements in test technologies.

44 **Keywords:** Diabetes, Low-resource settings, Diagnostics, Urine glucose test strip, Screening,

45

1  
2  
3 46 **Article Summary (word count: 2261)**  
4

5 47 ***Strengths and limitations of the study***  
6

- 7  
8 48 • This is one of the first studies to determine the prevalence of diabetes and report on the  
9  
10 49 screening accuracy of urine glucose test strips in Cambodia, which are commonly used as  
11  
12 50 screening tests in this setting.  
13  
14  
15 51 • We used a prospective community-based design and had a large sample size with high  
16  
17 52 participation rate, though participation bias towards those able to miss a day of work to  
18  
19 53 attend a clinic visit may still have been an issue.  
20  
21  
22 54 • Use of a composite reference test and not evaluating those with capillary fasting blood  
23  
24 55 glucose > 200 mg/dL by the oral glucose tolerance test, could have affected our study  
25  
26 56 results, though the use of oral glucose tolerance test allows comparison of our results to  
27  
28 57 those in a number of other studies.  
29  
30  
31 58 • The urine glucose test was self-administered and self reported, which is pragmatic and  
32  
33 59 aligns with the practices at MoPoTyso and other clinical settings in Cambodia, however  
34  
35 60 errors in interpreting the test result could influence accuracy.  
36  
37  
38  
39  
40

41 62 **Background**  
42

43 63 According to the International Diabetes Federation, 415 million adults are living with diabetes  
44  
45 64 globally, almost half of which are undiagnosed, and this number is expected to increase to 642  
46  
47 65 million by 2040.[1] As is the case for most non-communicable diseases, three quarters of those  
48  
49 66 affected live in low- and middle-income countries. In Cambodia for example, there are an  
50  
51 67 estimated 230,000 people with diabetes, who are at risk for the associated micro- and  
52  
53 68 macrovascular complications of this disease, including cardiovascular disease.[1,2] Strategies to  
54  
55  
56  
57  
58  
59  
60

1  
2  
3 69 reduce cardiovascular disease risk may also prevent and control diabetes, which would further  
4  
5 70 reduce rates of eye, kidney, and neural damage due to diabetes complications.[3] To facilitate  
6  
7 71 screening and monitoring for diabetes in these low- and middle-income countries, a low-cost,  
8  
9 72 point-of-care diagnostic test that is resource and context appropriate is needed.  
10  
11  
12  
13

14 74 In low-resource settings, urine glucose test strips have been used as diabetes screening tools  
15  
16 75 because they are inexpensive, noninvasive, and easy to use.[4,5] While these tests do not require  
17  
18 76 fasting and are user friendly, they can only detect glucose after it has exceeded the threshold for  
19  
20 77 reabsorption by the kidneys and appears in the urine. The reported threshold varies and is  
21  
22 78 affected by kidney function.[6] Although their low sensitivity makes them inadequate for use as  
23  
24 79 a screening tool,[7-9] the World Health Organisation acknowledges that they may have a place  
25  
26 80 in low resource settings where other tests are not possible and the prevalence of undiagnosed  
27  
28 81 diabetes may be high.[9] Currently many people are not diagnosed until severe complications  
29  
30 82 develop. Although the sensitivity of the urine test delays diagnosis relative to other methods, it  
31  
32 83 may provide an opportunity to reduce further advancement of complications.  
33  
34  
35  
36  
37  
38  
39

40 85 MoPoTsyo, a nongovernmental organization, provides screening and care services to people with  
41  
42 86 diabetes and hypertension in Cambodia through an innovative, community-based peer educator  
43  
44 87 model.[10-12] MoPoTsyo uses urine glucose test strips issued in the community and self-  
45  
46 88 administered by patients as the initial method of diabetes screening, which has allowed them to  
47  
48 89 screen over 700,000 adults, followed by confirmation with blood glucose testing for those who  
49  
50 90 have a positive urine test. The aim of this study was to determine the diagnostic accuracy of a  
51  
52 91 self-administered urine glucose test strip compared to alternative diabetes screening tools in a  
53  
54  
55  
56  
57  
58  
59

1  
2  
3 92 low resource setting of Cambodia. We also explored whether individuals with diabetes who were  
4  
5 93 detected by urine glucose test strips differed in health status compared to those who were missed  
6  
7  
8 94 by this test but detected by blood glucose measurement. Greater understanding of the  
9  
10 95 performance of this test by the MoPoTsyo program will help to inform its optimal use.  
11  
12  
13 96

## 14 97 **Methods**

### 15 98 *Study design and procedures*

16  
17 99 A prospective cross-sectional study was performed among members of the Borey Santhepheap  
18  
19  
20  
21 100 community in Cambodia (Phnom Penh Municipality, District Dangkao, Commune Chom Chao)  
22  
23  
24 101 from November 2013 to October 2014. All households on randomly selected streets were invited  
25  
26 102 to participate by a local peer educator, who described the study to all potential household  
27  
28 103 members. Adults at least 18 years of age living in the study area were eligible for inclusion.  
29  
30 104 Individuals were excluded if they had diabetes or hypertension or had taken medications for  
31  
32 105 diabetes and/or high blood pressure in the last 30 days, had kidney disease, or had received  
33  
34 106 dialysis. Written informed consent was obtained from all participants. The protocol was approved  
35  
36  
37 107 by the PATH Research Ethics Committee and the National Ethics Committee for Health  
38  
39 108 Research (Cambodia Institutional Review Board). Study methods and results are reported in  
40  
41  
42 109 alignment with the 2015 STARD recommendations.[13]  
43  
44  
45 110

46  
47 111 After enrollment, all participants were screened for diabetes using a self-administered and self-  
48  
49 112 reported urine glucose test strip (Sichuan Medicines and Health Products, Chengdu, China).  
50  
51 113 Participants were taught how to use the test strip and read the results with assistance of a color  
52  
53 114 chart, and were given several ways to report results to their peer educator. All participants were  
54  
55  
56  
57  
58  
59  
60

1  
2  
3 115 then invited to attend the clinic following an 8-hour fast for laboratory confirmed tests for  
4  
5 116 diabetes and associated co-morbid risk factors. Upon arriving at the clinic all participants  
6  
7 117 provided a urine sample, a venous blood sample, and a finger stick blood sample for capillary  
8  
9 118 fasting blood glucose measurement (cFBG) (On Call Plus glucometer, Acon Laboratories, San  
10  
11 119 Diego, USA, <https://www.aconlabs.com/us/glucose/on-call/plus-bgms/>). If the cFBG was less  
12  
13 120 than 200 mg/dL they were asked to consume a 75g oral glucose load for the oral glucose  
14  
15 121 tolerance test (OGTT). The oral glucose load was ingested within 5 minutes of starting  
16  
17 122 consumption, and two hours after ingestion, further venous blood and finger stick blood samples  
18  
19 123 were obtained for glucose measurements. During the visit, a health history was completed based  
20  
21 124 on the WHO STEPS surveillance questionnaire [14] and blood pressure measured by trained  
22  
23 125 clinical staff using an electronic device (Omron Corporation, Tokyo, Japan). All devices used in  
24  
25 126 the study were owned and used previously by MoPoTsyo within the guidelines of the Cambodian  
26  
27 127 Ministry of Health; none of the devices were investigational. Additional laboratory tests  
28  
29 128 performed included HbA1c (DCA Vantage Analyzer, Siemens AG, Germany), serum creatinine,  
30  
31 129 glucose, total cholesterol, high-density lipoprotein cholesterol, and triglycerides (Humalyzer  
32  
33 130 3000 Chemistry Analyzer, Human Diagnostics, Germany), spot urine creatinine, protein, and  
34  
35 131 albumin tests (Combilyzer dipstick reader, Human Diagnostics, Germany).

36  
37 132  
38  
39 133 A sample size of 1315 participants was calculated for a desired precision range of 10% and an  
40  
41 134 estimated sensitivity and specificity of the urine glucose test strip of 21% and 90%, respectively,  
42  
43 135 which is also sufficient for analysis of HbA1c, OGTT, and FBG as the test strip has the lowest  
44  
45 136 performance. The sample size for the study was calculated based on Buderer's formula [15],  
46  
47 137 accounting for a 3% drop-out rate and a 5% national prevalence of diabetes [16].  
48  
49  
50  
51  
52  
53  
54  
55  
56  
57  
58  
59  
60

138

**Data Analysis**

The index tests of interest were a positive self-administered urine glucose test strip, HbA1c >6.5%, and cFBG  $\geq$ 126 mg/dL. Diagnostic accuracy was assessed against a composite reference standard, which was cFBG  $\geq$ 200 mg/dL, or venous blood glucose, 2 hours after OGTT  $\geq$ 200 mg/dL.[17,18] If the participant's cFBG was >200 mg/dL, the patient was considered to have diabetes and an OGTT was not performed. Other measures were defined as follows: Overweight (BMI  $\geq$ 25 or waist circumference >90cm for men or >80cm for women[19]), elevated blood pressure (systolic pressure  $\geq$ 140mmHg or diastolic pressure  $\geq$ 90mmHg), albuminuria ( $\geq$ 20 mg/L), and elevated albumin/creatinine ratio ( $\geq$ 30mg/g). We calculated sensitivity, specificity, positive predictive value (PPV), negative predictive value (NPV), positive likelihood ratio (LR+), negative LR (LR-),with 95% confidence intervals (CI).

150

Subgroup analyses were not prespecified, and therefore used to explore the performance of the urine glucose test strip in participants at increased risk for diabetes mellitus (DM), including age ( $\geq$ 50 years), BMI ( $\geq$ 25), gender, and waist circumference (>90cm for men or >80cm for women). Logistic regression analyses were also used to determine if the diagnostic accuracy of the index test was impacted by these clinical features. Prevalence of diabetes by subgroup was compared by chi-squared test. We also explored whether the individuals correctly classified by the urine glucose test strip had better or worse controlled diabetes than those misclassified by the test, as defined by various clinical and laboratory measures. Mean values of continuous variables were compared using Student's t-test while proportions of dichotomous values were compared using the chi-squared test. Data were analyzed using Stata/SE 13.1 (StataCorp LP, Texas, USA).



161

**162 Results**

163 Of 1328 eligible study subjects, 1316 participated in the study and 1289 were included in the  
164 analysis (Figure 1). Participants were excluded from the analysis if they did not complete the  
165 OGTT due to vomiting or other reasons (16), were not fasting prior to the clinic visit (5), or  
166 reported taking medication for diabetes that day (6). Of the analyzed participants, 75%  
167 (972/1289) were female, mean age was 51 years, 31% had high BMI, and 13% had elevated  
168 blood pressure, although only 8% were taking antihypertensive medications. Characteristics of  
169 the participants included in the analysis are presented in Table 1.

170

171 A total of 234 individuals had diabetes based on the composite reference standard of either cFBG  
172 (70, 30%) or OGTT (164, 70%), corresponding to a prevalence of 18%. The 70 individuals with  
173 cFBG  $\geq 200$  mg/dL, also all had HbA1c measurements  $> 6.5\%$ . Of the index tests evaluated, the  
174 urine glucose test strip had lower sensitivity (14.1%, 95% CI: 9.90-19.2) than cFBG (73.9%,  
175 95% CI: 67.8-79.4), and HbA1c (75.2%, 95% CI: 69.2-80.6). All three tests offered high  
176 specificity (99.3%, 95% CI: 98.6-99.7; 96.8%, 95% CI: 95.5-97.8; and 98.5%, 95% CI: 97.5-  
177 99.1; respectively) (Table 2). The urine glucose test strip failed to identify 201 individuals with  
178 diabetes (false negatives) and falsely identified seven participants without diabetes (false  
179 positives). The 201 patients with diabetes who were not identified by the urine test had  
180 significantly lower venous FBG, lower 2 hr OGTT, and lower HbA1c compared to those  
181 correctly diagnosed, but were similar in other characteristics (Table 3). The seven false positive  
182 individuals had higher HbA1c, higher systolic BP, and higher proportion receiving treatment for  
183 hypertension than those with true negative results (Table 3).

1  
2  
3 184  
4  
5 185 The prevalence of diabetes (diagnosed by the composite reference standard) was significantly  
6  
7 186 higher in participants who were 50 years of age or older compared to those under 50 years (24%  
8  
9 187 vs. 9.6%); those with high BMI compared to those with normal BMI (22% vs. 17%); and those  
10  
11 188 with greater waist circumference compared to those with normal waist (24% vs. 13%), but was  
12  
13 189 the same in males and females (Table 4). The diagnostic accuracy of the urine glucose test strip  
14  
15 190 was similar among subgroups of patients with various cofactors, with overlapping confidence  
16  
17 191 intervals (Table 4). Additionally, multivariate and univariate logistic regression analyses also  
18  
19 192 indicated that the diagnostic accuracy of the index test was not significantly impacted by these  
20  
21 193 cofactors.  
22  
23  
24  
25

26 194

## 28 195 **Discussion**

30 196 Urine glucose test strips had much lower sensitivity than either cFBG or HbA1c, but all three  
31  
32 197 tests offered high specificity. Patients who tested positive with the urine glucose test who were  
33  
34 198 confirmed to have diabetes by the reference standard (true positives) had higher FBG, higher  
35  
36 199 OGTT and higher HbA1c levels compared to the false negative group (urine test negative in  
37  
38 200 patients with diabetes), suggesting that the urine glucose test may identify individuals with poor  
39  
40 201 glycemic control. This suggests a subset of diabetes patients is being identified that may  
41  
42 202 potentially be at higher risk of advancing complications or comorbidities, and who may benefit  
43  
44 203 the most from further care [20]. In addition, testing for urine glucose was highly specific (99%),  
45  
46 204 with positive LRs in the 20s, indicating that when positive, this test is highly indicative of  
47  
48 205 diabetes.  
49  
50  
51  
52  
53

54 206

1  
2  
3 207 The prevalence of diabetes in the MoPoTsyo population in Cambodia was 18%. This is much  
4  
5 208 higher than the national prevalence for Cambodia, which is reported at 3.0%.[1] This may be due  
6  
7  
8 209 to the high proportion of individuals over 50 years of age in our study population, which could  
9  
10 210 be explained by a participation bias towards those who were able to miss a day of work to attend  
11  
12 211 a clinic visit. Additionally, our study took place in a rapidly changing urban population, which  
13  
14  
15 212 had a 2.4 times higher diabetes prevalence in the STEP survey, country report from 2010.[21]  
16

17 213  
18  
19 214 A wide range of sensitivities for the urine glucose test strip has been reported, and its use  
20  
21 215 remains controversial. A review in 2000 found six adequately designed studies that reported  
22  
23 216 performance of urine test strips for glucose.[8] Among these, sensitivities in two reports of  
24  
25 217 fasting patients were 16% and 35%; two using random samples found sensitivities of 18% and  
26  
27 218 64%; and three using postprandial and post-load measurements reported sensitivities between  
28  
29 219 39% and 48%. This review concluded that blood glucose measurements were preferred over  
30  
31 220 urinary glucose or HbA1c, and particularly, postprandial over fasting measures. Another review  
32  
33 221 found five studies reporting a range of sensitivity from 18% to 74% for urine glucose test  
34  
35 222 strips.[7] The review concluded that urine glucose test strips are not sufficient for screening for  
36  
37 223 diabetes.  
38  
39  
40  
41  
42  
43

44 224  
45 225 This is one of the first studies to determine the prevalence of diabetes in Cambodia, and report on  
46  
47 226 the screening accuracy of urine glucose test strips which are commonly used as screening tests in  
48  
49 227 this setting. We used a prospective community-based design and had a large sample size with  
50  
51 228 high participation rate. The study had several limitations. Firstly, we used a composite reference  
52  
53 229 test and those with cFBG > 200 mg/dL were not evaluated by the OGTT. When evaluating the  
54  
55  
56  
57  
58  
59  
60

1  
2  
3 230 index test of cFBG, the index test is included in the reference test, though at a different threshold.  
4  
5 231 This can cause incorporation bias resulting in an inflated test accuracy. Here the three different  
6  
7  
8 232 index tests are included for comparison; however, the likely overestimation of diagnostic  
9  
10 233 accuracy for cFBG is important to keep in mind. While OGTT is considered the gold standard  
11  
12 234 reference test for assessing diagnostic accuracy, there has been some question of its performance.  
13  
14 235 Two studies in China, each on more than 200 participants, found that the reproducibility of the  
15  
16 236 OGTT was 56% [22] and 66% [23]. Though our choice of the reference standards, particularly  
17  
18 237 OGTT, could have affected our study results, its use allows comparison of our results to those in  
19  
20 238 a number of other studies. Second, the urine glucose test was self-administered and self reported.  
21  
22 239 While this was pragmatic, and aligns with the practices at MoPoTyso and other clinical settings  
23  
24 240 in Cambodia, errors in interpreting the test result could influence accuracy. We were not able to  
25  
26 241 repeat this test when patients attended their clinic visit as they were fasting at the clinic visit, and  
27  
28 242 thus their urine would not have been the random non-fasting urine test obtained at home. Third,  
29  
30 243 we were not able to obtain hemoglobin levels (or test for hemoglobin variants) as these tests are  
31  
32 244 not available in this setting, and hence cannot assess the impact of anemia or hemoglobinopathy  
33  
34 245 on test performance.[24] Fourth, glucose test strip accuracy may be subject to effects of heat and  
35  
36 246 humidity, we were not able to explore their possible impact on our results.  
37  
38  
39  
40 247  
41  
42  
43  
44 248 For clinicians working in settings similar to ours, the question is how useful is the urine glucose  
45  
46 249 test as a screening or diagnostic test, and is it “better than nothing”? The low sensitivity certainly  
47  
48 250 reduces the value of this test as a screening tool, but the high specificity means that positive tests  
49  
50 251 can be used to rule in patients with diabetes, suggesting that urine glucose may have some  
51  
52 252 diagnostic value in this setting. The false positive rate was extremely low, and only 7 patients  
53  
54  
55  
56  
57  
58  
59  
60

1  
2  
3 253 without disease were identified as positive by urine glucose test strip. From a population  
4  
5 254 perspective, the value of a low cost, poorly sensitive yet highly specific test for diabetes is  
6  
7  
8 255 unclear in terms of balancing the opportunity to identify a subset of patients with less well  
9  
10 256 controlled diabetes who would not have been identified otherwise, with the downside of a high  
11  
12 257 false negative rate.[25]  
13

14 258  
15  
16  
17 259 Not surprisingly, usability parameters and cost make urine glucose test strips a highly desirable  
18  
19 260 test in this and other low-resource settings.[9] Product attributes such as low complexity and  
20  
21 261 infrastructure requirements, short time to results, and low participant burden greatly contribute to  
22  
23 262 the acceptability and desirability of the screening tool. The large patient burden and the frequent  
24  
25 263 inability to comply with fasting requirements reduce the feasibility of using OGTT or FBG tests.  
26  
27 264 While HbA1c testing does not require fasting, current tests are too expensive for use in most  
28  
29 265 low-income countries. The role of a poorly sensitive test like urine glucose in resource poor  
30  
31 266 settings such as Cambodia is debatable, on the one hand the test will identify some patients  
32  
33 267 previously undiagnosed, and assuming treatment can be initiated, reduce severity of  
34  
35 268 complications from this disease. On the other hand, the test will miss the majority of patients  
36  
37 269 with diabetes, thus risking a false reassurance, further postponement of diagnosis, and risking  
38  
39 270 patient's respect for the health care system.  
40  
41  
42  
43

44 271  
45  
46  
47 272 There may be strategies to improve the performance (particularly sensitivity) of the urine glucose  
48  
49 273 test strip. First, using presence of risk factors such as high waist circumference or BMI, may  
50  
51 274 increase the pretest probability of diabetes and lead to improved performance. In our study, the  
52  
53 275 sensitivity of the urine glucose test strip among overweight men with high waist circumference  
54  
55  
56  
57  
58  
59  
60

1  
2  
3 276 was twice the overall sensitivity (29% vs. 14% respectively). Second, using random,  
4  
5 277 postprandial, or glucose-loaded measurements may be superior than fasting because the renal  
6  
7 278 threshold for glucose is more often reached in non-fasting states.[8] Third, improving the limit of  
8  
9  
10 279 detection may be possible by modifications in the test strip itself, or improvement in the way it is  
11  
12 280 read either manually (with trained users) or automatically (with electronic reading devices).  
13  
14 281 Finally, increasing screening frequency may be feasible in low resource settings, if the urine  
15  
16 282 glucose test strip truly does identify a smaller but more advanced fraction of diabetes patients.  
17  
18  
19 283

## 21 284 **Conclusion**

23  
24 285 Low cost, easy to use diabetes screening, diagnosis, and monitoring tools are essential for low-  
25  
26 286 resource communities with minimal infrastructure. While the urine glucose test strip has some  
27  
28 287 value as a screening test in these settings, its performance is far from optimal. Progress is  
29  
30 288 urgently needed to improve the performance, availability, and access of essential testing  
31  
32  
33 289 technologies for diabetes.  
34

35 290

37 291

## 40 292 **List of abbreviations**

41  
42 293 urine glucose test strip (UGTS)

43  
44 294 capillary fasting blood glucose measurement (cFBG)

45  
46 295 oral glucose tolerance test (OGTT)

47  
48 296 positive predictive value (PPV)

49  
50 297 negative predictive value (NPV)

51  
52 298 positive likelihood ratio (LR+)

53

54

55

56

1  
2  
3 299 negative likelihood ratio (LR-)

4  
5 300 confidence intervals (CI)

6  
7 301 diabetes mellitus (DM)

8  
9 302

10  
11  
12 303 **Declarations**

13  
14 304 *Ethical approval and consent to participate*

15  
16  
17 305 The protocol was approved by the PATH Research Ethics Committee and the National Ethics

18  
19 306 Committee for Health Research (Cambodia Institutional Review Board). Informed consent was

20  
21 307 obtained from all participants.

22  
23 308 *Consent for publication*

24  
25 309 Not applicable.

26  
27 310 *Availability of data and material*

28  
29 311 The datasets used during the current study are available from the corresponding author on

30  
31 312 reasonable request.

32  
33 313 *Competing Interests*

34  
35 314 The authors declare that they have no competing interests.

36  
37 315 *Funding*

38  
39 316 This work was supported by a grant from Medtronic Foundation, and received additional support

40  
41 317 from PATH and the University of Washington Department of Family Medicine. The funding

42  
43 318 source had no involvement in study design, data collection, data analysis, data interpretation,

44  
45 319 writing of the manuscript, or the decision to publish the results.

46  
47 320 *Authors contributions*

321 MHP, SB, TN, HM and BW designed the study; MHP, SB, TN, and BW implemented the study;  
 322 HLS, MT, HM, and BW analysed and interpreted the data; HLS, MHP, FD, MT, HM, and BW  
 323 contributed to writing. All authors read and approved the final manuscript.

### 324 *Acknowledgements*

325 We would like to acknowledge the Borey Santhepheap community in Cambodia (Phnom Penh  
 326 Municipality, District Dangkao, Commune Chom Chao) for participating in this study. We also  
 327 acknowledge the input of Dr Annette Fitzpatrick and Dr Jim LoGerfo from the University of  
 328 Washington.

### 329 *Authors' information*

330 Not applicable.

331

332

## 333 **Tables**

334

335 **Table 1.** Characteristics of included participants.

|                                                   | Mean (SD) or %<br>n=1289 |
|---------------------------------------------------|--------------------------|
| Age, years                                        | 51.4 (14.9)              |
| Female (%)                                        | 75.4                     |
| BMI <sup>1</sup>                                  | 23.2 (4.1)               |
| High BMI (%)                                      | 30.5                     |
| Waist circumference above cutoff <sup>2</sup> (%) | 46.1                     |
| Systolic blood pressure, mmHg                     | 123.5 (20.6)             |
| Diastolic blood pressure, mmHg                    | 80.8 (12.1)              |
| Elevated blood pressure (%)                       | 12.9                     |
| Take treatment for high blood pressure (%)        | 8.2                      |

336 <sup>1</sup>n=1288

337 <sup>2</sup>>90cm for men, >80cm for women. [19]

338

339

340 **Table 2.** Diagnostic accuracy of urine glucose test strip, capillary fasting glucose, and HbA1c determined  
 341 by comparison with the composite reference standard (n=1289)<sup>1</sup>.

342

|                           | Urine glucose test<br>strip positive | cFBG ≥126 mg/dL | HbA1c >6.5% |
|---------------------------|--------------------------------------|-----------------|-------------|
| <b>True positive (n)</b>  | 33                                   | 173             | 176         |
| <b>False positive (n)</b> | 7                                    | 34              | 16          |
| <b>False negative (n)</b> | 201                                  | 61              | 58          |



|                                                     |                          |                   |                   |
|-----------------------------------------------------|--------------------------|-------------------|-------------------|
| <b>True negative (n)</b>                            | 1048                     | 1021              | 1039              |
| <b>True diabetes prevalence<sup>2</sup> (95%CI)</b> | 18%, 234/1289 (16, 20.4) |                   |                   |
| <b>Sensitivity (95% CI)</b>                         | 14.1 (9.90, 19.2)        | 73.9 (67.8, 79.4) | 75.2 (69.2, 80.6) |
| <b>Specificity (95% CI)</b>                         | 99.3 (98.6, 99.7)        | 96.8 (95.5, 97.8) | 98.5 (97.5, 99.1) |
| <b>Positive PV (95% CI)</b>                         | 82.5 (67.2, 92.7)        | 83.6 (77.8, 88.3) | 91.7 (86.8, 95.2) |
| <b>Negative PV (95% CI)</b>                         | 83.9 (81.7, 85.9)        | 94.4 (92.8, 95.7) | 94.7 (93.2, 96.0) |
| <b>Positive LR (95% CI)</b>                         | 21.3 (9.50, 47.5)        | 22.9 (16.3, 32.2) | 49.6 (30.3, 81.1) |
| <b>Negative LR (95% CI)</b>                         | 0.90 (0.80, 0.90)        | 0.30 (0.20, 0.30) | 0.30 (0.20, 0.30) |

<sup>1</sup> Excludes individuals taking diabetes treatment that day (n=6), did not fast before OGTT as instructed (n=5), or did not complete the OGTT (n=16).

<sup>2</sup> Composite reference standard: OGTT  $\geq$ 200 mg/dL or cFBG  $\geq$ 200 mg/dL. 70 patients with cFBG  $\geq$ 200 were not tested by OGTT.

**Table 3.** Diagnostic accuracy of the urine glucose test strip by patient characteristics.

| Patient characteristic: Mean (SD) or %     | Diabetic <sup>1</sup> |                         | Non-diabetic <sup>1</sup> |                         |
|--------------------------------------------|-----------------------|-------------------------|---------------------------|-------------------------|
|                                            | True Positive<br>n=33 | False Negative<br>n=201 | False Positive<br>n=7     | True Negative<br>n=1048 |
| Age                                        | 57 (9.3)              | 58 (10.5)               | 56 (11.9)                 | 50 (15.5)               |
| Female (%)                                 | 81.8                  | 74.6                    | 85.7                      | 75.3                    |
| Venous fasting blood glucose               | <b>207 (75.3)</b>     | <b>166 (73.2)</b>       | 95 (16.9)                 | 90 (13.1)               |
| Venous blood glucose 2 hrs after OGTT      | <b>310 (60.8)</b>     | <b>275 (62.2)</b>       | 115 (43.2)                | 120 (31.0)              |
| Change in venous blood glucose during OGTT | 160 (50.8)            | 146 (49.8)              | 20 (47.7)                 | 30 (30.0)               |
| HbA1c                                      | <b>10 (2.3)</b>       | <b>8 (2.4)</b>          | <b>6 (0.7)</b>            | <b>5 (0.5)</b>          |
| BMI                                        | 24 (3.9)              | 24 (3.9)                | 26 (3.2)                  | 23 (4.1)                |
| High BMI (%)                               | 33.3                  | 36.8                    | 57.1                      | 29.0                    |
| Waist circumference above cutoff (%)       | 60.6                  | 61.7                    | 71.4                      | 42.8                    |
| Systolic blood pressure                    | 132 (24.9)            | 130 (20.6)              | <b>146 (14.0)</b>         | <b>122 (20.2)</b>       |
| Diastolic blood pressure                   | 85 (9.6)              | 84 (11.7)               | 87 (6.5)                  | 80 (12.1)               |
| Elevated blood pressure (%)                | 15.2                  | 20.9                    | 14.3                      | 11.3                    |
| Take treatment for high blood pressure (%) | 18.2                  | 11.4                    | <b>28.6</b>               | <b>7.1</b>              |
| Total Cholesterol                          | 242 (62.3)            | 227 (69.8)              | 240 (63.1)                | 213 (56.3)              |
| Proteinuria (n=1116) <sup>2</sup> (%)      | 20.0                  | 17.2                    | 0                         | 3.0                     |
| Albuminuria (%)                            | 51.5                  | 47.8                    | 14.3                      | 21.7                    |
| Abnormal albumin/creatinine ratio (%)      | 39.3                  | 39.3                    | 14.3                      | 17.3                    |

<sup>1</sup> Diagnosis by the composite reference standard: venous OGTT  $\geq$ 200 mg/dL or cFBG  $\geq$ 200 mg/dL. 70 patients with cFBG  $\geq$ 200 were not tested by OGTT.

<sup>2</sup> 4 missing values, 169 indeterminate measurements not included in analysis.

**Bold = significantly different ( $p \leq 0.05$ ) by Student's t-test or chi-squared test.**

**Table 4.** Diagnostic accuracy of urine glucose test strip by participant cofactors (n=1289)<sup>1</sup>.

| Results | Cofactors |
|---------|-----------|
|---------|-----------|

|                                       | Age                        |                            | BMI <sup>3</sup>           |                            | Gender               |                      | Waist circumference <sup>4</sup> |                            |
|---------------------------------------|----------------------------|----------------------------|----------------------------|----------------------------|----------------------|----------------------|----------------------------------|----------------------------|
|                                       | <50                        | ≥50                        | <25                        | ≥25                        | Male                 | Female               | Normal                           | High                       |
| Number of participants                | 531                        | 758                        | 895                        | 393                        | 317                  | 972                  | 691                              | 598                        |
| True positive (n)                     | 8                          | 25                         | 22                         | 11                         | 6                    | 27                   | 13                               | 20                         |
| False positive (n)                    | 3                          | 4                          | 3                          | 4                          | 1                    | 6                    | 2                                | 5                          |
| False negative (n)                    | 43                         | 158                        | 127                        | 74                         | 51                   | 150                  | 77                               | 124                        |
| True negative (n)                     | 477                        | 571                        | 743                        | 304                        | 259                  | 789                  | 599                              | 449                        |
| True diabetes prevalence <sup>2</sup> | <b>9.6%</b><br>(7.2, 12.4) | <b>24%</b><br>(21.0, 27.4) | <b>17%</b><br>(14.0, 19.3) | <b>22%</b><br>(18.0, 26.0) | 18%<br>(14.0, 22.7)  | 18%<br>(16.0, 20.8)  | <b>13%</b><br>(11.0, 15.8)       | <b>24%</b><br>(21.0, 27.7) |
| Sensitivity (95% CI)                  | 15.7<br>(7.0, 28.6)        | 13.7<br>(9.0, 19.5)        | 14.8<br>(9.5, 21.5)        | 12.9<br>(6.6, 22.0)        | 10.5<br>(4.0, 21.5)  | 15.3<br>(10.3, 21.4) | 14.4<br>(7.9, 23.4)              | 13.9<br>(8.7, 20.6)        |
| Specificity (95% CI)                  | 99.4<br>(98.2, 99.9)       | 99.3<br>(98.2, 99.8)       | 99.6<br>(98.8, 99.9)       | 98.7<br>(96.7, 99.6)       | 99.6<br>(97.9, 100)  | 99.2<br>(98.4, 99.7) | 99.7<br>(98.8, 100)              | 98.9<br>(97.4, 99.6)       |
| Positive PV (95% CI)                  | 72.7<br>(39, 94.0)         | 86.2<br>(68.3, 96.1)       | 88<br>(68.8, 97.5)         | 73.3<br>(44.96, 92.2)      | 85.7<br>(42.1, 99.6) | 81.8<br>(64.5, 93.0) | 86.7<br>(59.5, 98.3)             | 80<br>(59.3, 93.2)         |
| Negative PV (95% CI)                  | 91.7<br>(89, 94)           | 78.3<br>(75.2, 81.3)       | 85.4<br>(82.9, 87.7)       | 80.4<br>(76.1, 84.3)       | 83.5<br>(78.9, 87.5) | 84<br>(81.5, 86.3)   | 88.6<br>(86, 90.9)               | 78.4<br>(74.8, 81.7)       |
| Positive LR (95% CI)                  | 25.1<br>(6.9, 91.6)        | 19.6<br>(6.9, 55.7)        | 36.7<br>(11.1, 121)        | 10.0<br>(3.3, 30.5)        | 27.4<br>(3.4, 223)   | 20.2<br>(8.5, 48.2)  | 43.4<br>(10.0, 189)              | 12.6<br>(4.8, 33)          |
| Negative LR (95% CI)                  | 0.8<br>(0.8, 1.0)          | 0.9<br>(0.8, 0.9)          | 0.9<br>(0.8, 0.9)          | 0.9<br>(0.8, 1.0)          | 0.9<br>(0.8, 1.0)    | 0.85<br>(0.80, 0.91) | 0.86<br>(0.79, 0.94)             | 0.87<br>(0.82, 0.93)       |

<sup>1</sup> Excludes individuals taking diabetes treatment that day (n=6), did not fast before OGTT as instructed (n=5), or did not complete the OGTT (n=16).

<sup>2</sup> Composite reference standard: OGTT ≥200 mg/dL or cFBG ≥200 mg/dL. 70 patients with cFBG ≥200 were not tested by OGTT.

<sup>3</sup> n=1288.

<sup>4</sup> High Waist circumference = >90cm for men, >80cm for women.[19]

**Bold = significantly different ( $p \leq 0.05$ ), chi-squared test.**

## Figure legend

**Figure 1:** Study flow diagram.

Reference List

- 1  
2  
3 382 1. IDF Diabetes Atlas, 7th Edition. International Diabetes Federation . 2015. International Diabetes  
4 383 Federation.  
5 384 Ref Type: Electronic Citation  
6  
7 385 2. Forbes JM, Cooper ME: **Mechanisms of diabetic complications.** *Physiol Rev* 2013, **93(1)**: 137-  
8 386 188.  
9  
10 387 3. Tuomilehto J, Lindstrom J, Eriksson JG, Valle TT, Hamalainen H, Ilanne-Parikka P *et al.*:  
11 388 **Prevention of type 2 diabetes mellitus by changes in lifestyle among subjects with impaired**  
12 389 **glucose tolerance.** *N Engl J Med* 2001, **344**: 1343-1350.  
13  
14 390 4. Dyerberg J, Pedersen L, Aagaard O: **Evaluation of a dipstick test for glucose in urine.** *Clin Chem*  
15 391 1976, **22**: 205-210.  
16  
17 392 5. van der Sande MA, Walraven GE, Bailey R, Rowley JT, Banya WA, Nyan OA *et al.*: **Is there a**  
18 393 **role for glycosuria testing in sub-Saharan Africa?** *Trop Med Int Health* 1999, **4**: 506-513.  
19  
20 394 6. Taal MW, Chertow GM, Marsden PA, Skorecki K, Yu ASL, Brenner BM: **Laboratory**  
21 395 **Assessment of Kidney Disease: Glomerular Filtration Rate, Urinalysis, and Proteinuria.** In  
22 396 *Brenner & Rector's The Kidney.* Philadelphia: Elsevier; 2012.  
23  
24 397 7. Wei OY, Teece S: **Best evidence topic report. Urine dipsticks in screening for diabetes**  
25 398 **mellitus.** *Emerg Med J* 2006, **23**: 138.  
26  
27 399 8. Engelgau MM, Narayan KM, Herman WH: **Screening for type 2 diabetes.** *Diabetes Care* 2000,  
28 400 **23**: 1563-1580.  
29  
30 401 9. World Health Organization. Screening for Type 2 Diabetes. Report of a World Health Organization  
31 402 and International Diabetes Federation meeting. 2003. Geneva, Switzerland, World Health  
32 403 Organization.  
33 404 Ref Type: Report  
34  
35 405 10. van Pelt M: **Improving access to education and care in Cambodia.** *Diabetes Voice* 2009, **54**.  
36  
37 406 11. Taniguchi D, LoGerfo J, van PM, Mielcarek B, Huster K, Haider M *et al.*: **Evaluation of a multi-**  
38 407 **faceted diabetes care program including community-based peer educators in Takeo province,**  
39 408 **Cambodia, 2007-2013.** *PLoS One* 2017, **12**: e0181582.  
40  
41 409 12. van Olmen J, Eggermont N, van Pelt M, Hen H, de Man J, Schellevis F *et al.*: **Patient-centred**  
42 410 **innovation to ensure access to diabetes care in Cambodia: the case of MoPoTsyo.** *J Pharm*  
43 411 *Policy Pract* 2016, **9**: 1.  
44  
45 412 13. Bossuyt PM, Reitsma JB, Bruns DE, Gatsonis CA, Glasziou PP, Irwig L *et al.*: **STARD 2015: an**  
46 413 **updated list of essential items for reporting diagnostic accuracy studies.** *BMJ* 2015, **351**:  
47 414 h5527.  
48  
49 415 14. World Health Organization. WHO STEPS Surveillance Manual. World Health Organization . 6-13-  
50 416 2008. World Health Organization. 4-30-2015.  
51 417 Ref Type: Electronic Citation  
52  
53  
54  
55  
56  
57  
58  
59  
60

- 1  
2  
3 418 15. Obuchowski NA: **Sample size calculations in studies of test accuracy.** *Stat Methods Med Res*  
4 419 1998, **7**: 371-392.  
5  
6 420 16. King H, Keuky L, Seng S, Khun T, Roglic G, Pinget M: **Diabetes and associated disorders in**  
7 421 **Cambodia: two epidemiological surveys.** *Lancet* 2005, **366**: 1633-1639.  
8  
9 422 17. **Standards of Medical Care in Diabetes-2016 Abridged for Primary Care Providers.** *Clin*  
10 423 *Diabetes* 2016, **34**: 3-21.  
11  
12 424 18. Bartoli E, Fra GP, Carnevale Schianca GP: **The oral glucose tolerance test (OGTT) revisited.**  
13 425 *Eur J Intern Med* 2011, **22**: 8-12.  
14  
15 426 19. World Health Organization. Waist circumference and waist-hip ratio: report of a WHO expert  
16 427 consultation, Geneva, 8-11 December 2008. 2011. Geneva, Switzerland, World Health  
17 428 Organization.  
18 429 Ref Type: Report  
19  
20  
21 430 20. **The effect of intensive treatment of diabetes on the development and progression of long-term**  
22 431 **complications in insulin-dependent diabetes mellitus. The Diabetes Control and**  
23 432 **Complications Trial Research Group.** *N Engl J Med* 1993, **329**: 977-986.  
24  
25 433 21. University of Health Sciences Cambodia, Ministry of Health Cambodia. Prevalence of non-  
26 434 communicable disease risk factors in Cambodia; STEPS Survey Country Report. 2010.  
27 435 Ref Type: Report  
28  
29 436 22. Liu M, Pan CY, Jin MM, Su HY, Lu JM: **[The reproducibility and clinical significance of oral**  
30 437 **glucose tolerance test for abnormal glucose metabolism].** *Zhonghua Nei Ke Za Zhi* 2007, **46**:  
31 438 1007-1010.  
32  
33 439 23. Ko GT, Chan JC, Woo J, Lau E, Yeung VT, Chow CC *et al.*: **The reproducibility and usefulness**  
34 440 **of the oral glucose tolerance test in screening for diabetes and other cardiovascular risk**  
35 441 **factors.** *Ann Clin Biochem* 1998, **35 ( Pt 1)**: 62-67.  
36  
37 442 24. English E, Idris I, Smith G, Dhatariya K, Kilpatrick ES, John WG: **The effect of anaemia and**  
38 443 **abnormalities of erythrocyte indices on HbA1c analysis: a systematic review.** *Diabetologia*  
39 444 2015, **58**: 1409-1421.  
40  
41 445 25. Flessa S, Zembok A: **Costing of diabetes mellitus type II in Cambodia.** *Health Econ Rev* 2014,  
42 446 **4**: 24.  
43 447  
44 448  
45 449  
46 450  
47  
48  
49  
50  
51  
52  
53  
54  
55  
56  
57  
58  
59  
60

1  
2  
3  
4  
5  
6  
7  
8  
9  
10  
11  
12  
13  
14  
15  
16  
17  
18  
19  
20  
21  
22  
23  
24  
25  
26  
27  
28  
29  
30  
31  
32  
33  
34  
35  
36  
37  
38  
39  
40  
41  
42  
43  
44  
45  
46  
47  
48  
49  
50  
51  
52  
53  
54  
55  
56  
57  
58  
59  
60



86x71mm (300 x 300 DPI)

Peer Review Only

| Section & Topic          | No  | Item                                                                                                                                                   | Reported on page # |
|--------------------------|-----|--------------------------------------------------------------------------------------------------------------------------------------------------------|--------------------|
| <b>TITLE OR ABSTRACT</b> |     |                                                                                                                                                        |                    |
|                          | 1   | Identification as a study of diagnostic accuracy using at least one measure of accuracy (such as sensitivity, specificity, predictive values, or AUC)  | 1                  |
| <b>ABSTRACT</b>          |     |                                                                                                                                                        |                    |
|                          | 2   | Structured summary of study design, methods, results, and conclusions (for specific guidance, see STARD for Abstracts)                                 | 1                  |
| <b>INTRODUCTION</b>      |     |                                                                                                                                                        |                    |
|                          | 3   | Scientific and clinical background, including the intended use and clinical role of the index test                                                     | 3                  |
|                          | 4   | Study objectives and hypotheses                                                                                                                        | 4                  |
| <b>METHODS</b>           |     |                                                                                                                                                        |                    |
| <i>Study design</i>      | 5   | Whether data collection was planned before the index test and reference standard were performed (prospective study) or after (retrospective study)     | 5                  |
| <i>Participants</i>      | 6   | Eligibility criteria                                                                                                                                   | 5                  |
|                          | 7   | On what basis potentially eligible participants were identified (such as symptoms, results from previous tests, inclusion in registry)                 | 5                  |
|                          | 8   | Where and when potentially eligible participants were identified (setting, location and dates)                                                         | 5                  |
|                          | 9   | Whether participants formed a consecutive, random or convenience series                                                                                | 5                  |
| <i>Test methods</i>      | 10a | Index test, in sufficient detail to allow replication                                                                                                  | 5                  |
|                          | 10b | Reference standard, in sufficient detail to allow replication                                                                                          | 6                  |
|                          | 11  | Rationale for choosing the reference standard (if alternatives exist)                                                                                  | 6                  |
|                          | 12a | Definition of and rationale for test positivity cut-offs or result categories of the index test, distinguishing pre-specified from exploratory         | 6                  |
|                          | 12b | Definition of and rationale for test positivity cut-offs or result categories of the reference standard, distinguishing pre-specified from exploratory | 6                  |
|                          | 13a | Whether clinical information and reference standard results were available to the performers/readers of the index test                                 | 6                  |
|                          | 13b | Whether clinical information and index test results were available to the assessors of the reference standard                                          | 6                  |
| <i>Analysis</i>          | 14  | Methods for estimating or comparing measures of diagnostic accuracy                                                                                    | 7                  |
|                          | 15  | How indeterminate index test or reference standard results were handled                                                                                | 7                  |
|                          | 16  | How missing data on the index test and reference standard were handled                                                                                 | 7                  |
|                          | 17  | Any analyses of variability in diagnostic accuracy, distinguishing pre-specified from exploratory                                                      | 7                  |
|                          | 18  | Intended sample size and how it was determined                                                                                                         | 6                  |
| <b>RESULTS</b>           |     |                                                                                                                                                        |                    |
| <i>Participants</i>      | 19  | Flow of participants, using a diagram                                                                                                                  | 17                 |
|                          | 20  | Baseline demographic and clinical characteristics of participants                                                                                      | 15                 |
|                          | 21a | Distribution of severity of disease in those with the target condition                                                                                 | 15                 |
|                          | 21b | Distribution of alternative diagnoses in those without the target condition                                                                            | NA                 |
|                          | 22  | Time interval and any clinical interventions between index test and reference standard                                                                 | 5                  |
| <i>Test results</i>      | 23  | Cross tabulation of the index test results (or their distribution) by the results of the reference standard                                            | 15                 |
|                          | 24  | Estimates of diagnostic accuracy and their precision (such as 95% confidence intervals)                                                                | 15                 |
|                          | 25  | Any adverse events from performing the index test or the reference standard                                                                            | NA                 |
| <b>DISCUSSION</b>        |     |                                                                                                                                                        |                    |
|                          | 26  | Study limitations, including sources of potential bias, statistical uncertainty, and generalisability                                                  | 10                 |
|                          | 27  | Implications for practice, including the intended use and clinical role of the index test                                                              | 11                 |
| <b>OTHER INFORMATION</b> |     |                                                                                                                                                        |                    |
|                          | 28  | Registration number and name of registry                                                                                                               | NA                 |
|                          | 29  | Where the full study protocol can be accessed                                                                                                          | NA                 |
|                          | 30  | Sources of funding and other support; role of funders                                                                                                  | 14                 |

# STARD 2015

---

## AIM

STARD stands for “Standards for Reporting Diagnostic accuracy studies”. This list of items was developed to contribute to the completeness and transparency of reporting of diagnostic accuracy studies. Authors can use the list to write informative study reports. Editors and peer-reviewers can use it to evaluate whether the information has been included in manuscripts submitted for publication.

---

## EXPLANATION

A **diagnostic accuracy study** evaluates the ability of one or more medical tests to correctly classify study participants as having a **target condition**. This can be a disease, a disease stage, response or benefit from therapy, or an event or condition in the future. A medical test can be an imaging procedure, a laboratory test, elements from history and physical examination, a combination of these, or any other method for collecting information about the current health status of a patient.

The test whose accuracy is evaluated is called **index test**. A study can evaluate the accuracy of one or more index tests. Evaluating the ability of a medical test to correctly classify patients is typically done by comparing the distribution of the index test results with those of the **reference standard**. The reference standard is the best available method for establishing the presence or absence of the target condition. An accuracy study can rely on one or more reference standards.

If test results are categorized as either positive or negative, the cross tabulation of the index test results against those of the reference standard can be used to estimate the **sensitivity** of the index test (the proportion of participants *with* the target condition who have a positive index test), and its **specificity** (the proportion *without* the target condition who have a negative index test). From this cross tabulation (sometimes referred to as the contingency or “2x2” table), several other accuracy statistics can be estimated, such as the positive and negative **predictive values** of the test. Confidence intervals around estimates of accuracy can then be calculated to quantify the statistical **precision** of the measurements.

If the index test results can take more than two values, categorization of test results as positive or negative requires a **test positivity cut-off**. When multiple such cut-offs can be defined, authors can report a receiver operating characteristic (ROC) curve which graphically represents the combination of sensitivity and specificity for each possible test positivity cut-off. The **area under the ROC curve** informs in a single numerical value about the overall diagnostic accuracy of the index test.

The **intended use** of a medical test can be diagnosis, screening, staging, monitoring, surveillance, prediction or prognosis. The **clinical role** of a test explains its position relative to existing tests in the clinical pathway. A replacement test, for example, replaces an existing test. A triage test is used before an existing test; an add-on test is used after an existing test.

Besides diagnostic accuracy, several other outcomes and statistics may be relevant in the evaluation of medical tests. Medical tests can also be used to classify patients for purposes other than diagnosis, such as staging or prognosis. The STARD list was not explicitly developed for these other outcomes, statistics, and study types, although most STARD items would still apply.

---

## DEVELOPMENT

This STARD list was released in 2015. The 30 items were identified by an international expert group of methodologists, researchers, and editors. The guiding principle in the development of STARD was to select items that, when reported, would help readers to judge the potential for bias in the study, to appraise the applicability of the study findings and the validity of conclusions and recommendations. The list represents an update of the first version, which was published in 2003.

More information can be found on <http://www.equator-network.org/reporting-guidelines/stard>.

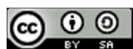

Supplement: bmjopen-2017-019924.draft_revisions.pdf [file bmjopen-2017-019924.draft_revisions.pdf]
